# Supplementary material for: Copper-free click bioconjugation of technetium-99m complexes using strained cyclononyne derivatives
Source: Royal Society of Chemistry journal article supplement (doi:10.1039/d2dt03965f), 2023-01-01
Supplement: d2dt03965f1.pdf [file d2dt03965f1.pdf]

## Supplementary Material

### Copper-free click bioconjugation of technetium-99m complexes using strained cyclononyne derivatives

Marlene Schlesinger,<sup>a,b</sup> Christian Jentschel,<sup>a</sup> Hans-Jürgen Pietzsch,<sup>a</sup> Klaus Kopka<sup>a,c</sup> and Constantin Mamat<sup>\* a,c</sup>

<sup>a</sup> Helmholtz-Zentrum Dresden-Rossendorf, Institut für Radiopharmazeutische Krebsforschung, Bautzner Landstraße 400, D-01328 Dresden, Germany.

<sup>b</sup> Universität Leipzig, Fakultät für Chemie und Mineralogie, Johannisallee 29, D-04103 Leipzig, Germany.

<sup>c</sup> Technische Universität Dresden, Fakultät Chemie und Lebensmittelchemie, D-01062 Dresden, Germany.

#### TOC

|                                                                                                           |    |
|-----------------------------------------------------------------------------------------------------------|----|
| Preparation of the nonradioactive Re reference compounds .....                                            | 2  |
| NMR spectra of compounds .....                                                                            | 4  |
| Synthesis of the functionalized PSMA-derivatives PSMA-N <sub>3</sub> and PSMA-NH <sub>2</sub> .....       | 18 |
| Copper-free strain-promoted cycloaddition between PSMA-N <sub>3</sub> and <sup>nat</sup> Re-DPA-DACN..... | 22 |
| <sup>99m</sup> Tc-Radiolabeling of DACN 6 and SPAAC-labeling with PSMA-N <sub>3</sub> .....               | 23 |
| <sup>99m</sup> Tc-Radiolabeling of TFP-ester 10 and conventional labeling of PSMA-NH <sub>2</sub> .....   | 25 |

## Preparation of the nonradioactive Re reference compounds

### <sup>nat</sup>Re-DPA-PSMA

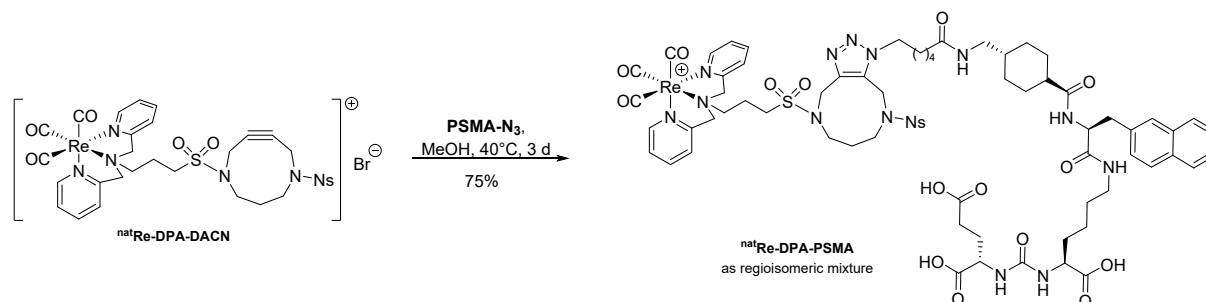

**PSMA-N<sub>3</sub>** (11.49 mg, 14.5 μmol, 1.01 eq.) and **<sup>nat</sup>Re-DPA-DACN** (12.74 mg, 14.4 μmol, 1.00 eq.) were dissolved in MeOH (5 mL) and the reaction was stirred at 40 °C for 3 d. After the consumption of **<sup>nat</sup>Re-DPA-DACN** was confirmed by analytical HPLC analysis, the solvent was removed and the crude product was purified by preparative HPLC (Zorbax 300SB-C18 semi-preparative column, solvent A: water + 0.1% TFA, solvent B: acetonitrile + 0.1% TFA, flow rate: 6 mL/min, gradient: A/B 70/30 → 30/70 in 35 min,  $t_R = 13.0$  min). The product was dried by lyophilization to give **<sup>nat</sup>Re-DPA-PSMA** as colourless solid (18 mg, 75%).

HPLC:  $t_R = 11.3$  min (Agilent C18 column, solvent A: water + 0.1% TFA, solvent B: acetonitrile + 0.1% TFA, flow rate: 1 mL/min, gradient: A/B 90/10 → 5/95 in 14 min),  $t_R = 17.6$  min (Phenomenex C12 column, solvent A: water + 0.1% TFA, solvent B: acetonitrile + 0.1% TFA, flow rate: 1 mL/min, gradient: A/B 95/5 → 5/95 in 20 min).

MS (ESI+):  $m/z = 838$  [M-Br+H]<sup>2+</sup> (<sup>185</sup>Re), 839 [M-Br+H]<sup>2+</sup> (<sup>187</sup>Re) / C<sub>70</sub>H<sub>86</sub>BrN<sub>14</sub>O<sub>19</sub>ReS<sub>2</sub> (1757.77).

## <sup>nat</sup>Re-DPA-NH-PSMA

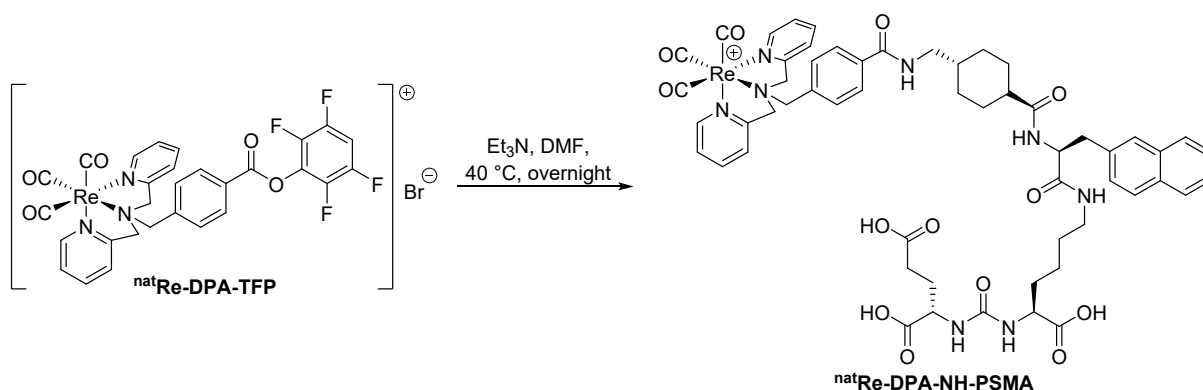

**PSMA-NH<sub>2</sub>** (8.52 mg, 13.0 μmol, 1.1 eq.), **<sup>nat</sup>Re-DPA-TFP** (8.88 mg, 11.8 μmol, 1.00 eq.), and Et<sub>3</sub>N (20 mL) were dissolved in anhydrous DMF (3 mL) and the reaction was stirred at 40 °C overnight. After the consumption of **<sup>nat</sup>Re-DPA-TFP** was confirmed by analytical HPLC analysis, the solvent was removed and the crude product was purified by preparative HPLC (Zorbax 300SB-C18 semi-preparative column, solvent A: water + 0.1% TFA, solvent B: acetonitrile + 0.1% TFA, flow rate: 6 mL/min, gradient: A/B 70/30 → 30/70 in 35 min, *t<sub>R</sub>* = 10.0 min). The product was dried by lyophilization to give **<sup>nat</sup>Re-DPA-NH-PSMA** as colourless solid (9.8 mg, 67%).

HPLC: *t<sub>R</sub>* = 15.7 min (Phenomenex C12 column, solvent A: water + 0.1% TFA, solvent B: acetonitrile + 0.1% TFA, flow rate: 1 mL/min, gradient: A/B 95/5 → 5/95 in 20 min).

MS (ESI+): *m/z* = 621 for [M+H]<sup>2+</sup> (<sup>185</sup>Re), 622 for [M+H]<sup>2+</sup> (<sup>187</sup>Re) / C<sub>56</sub>H<sub>62</sub>N<sub>8</sub>O<sub>13</sub>Re (1241.40).

## NMR spectra of compounds

### *N*-(3-((3-bromopropyl)sulfonamido)propyl)-2-nitrobenzenesulfonamide (**3**)

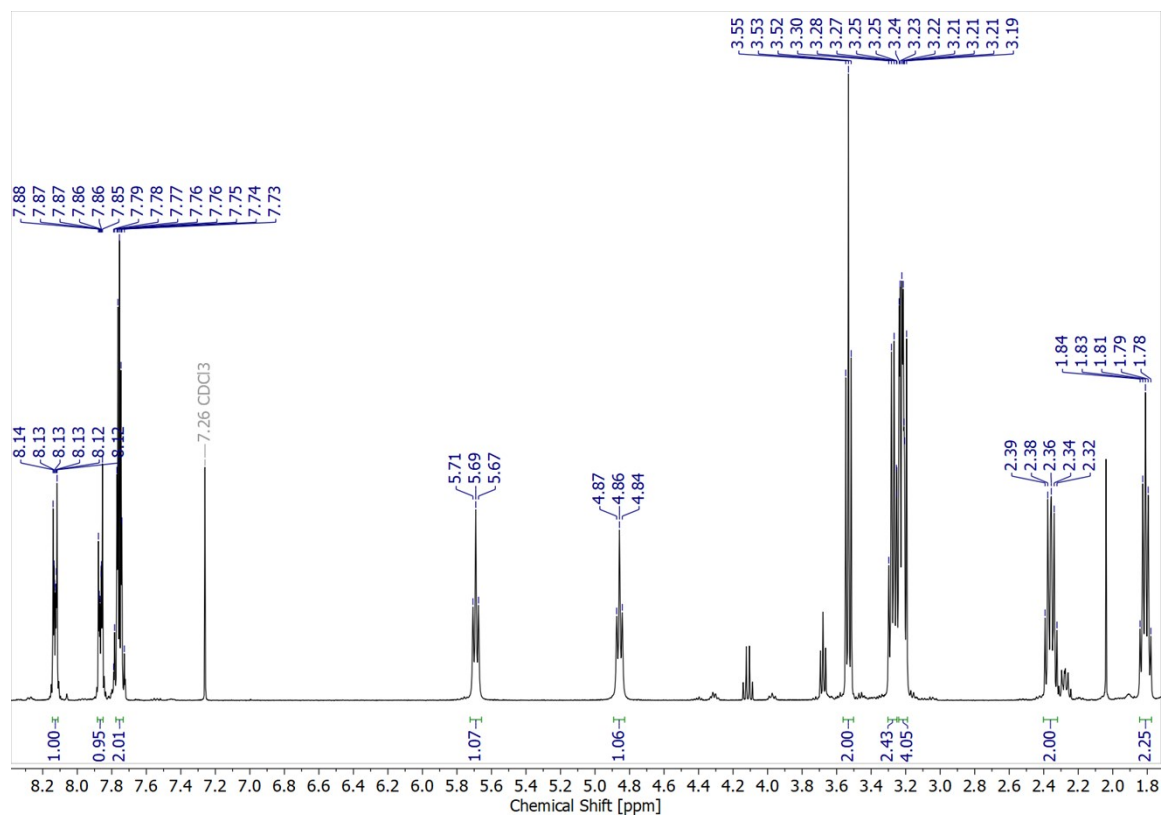

**Figure S1.** <sup>1</sup>H NMR spectrum of compound **3** in CDCl<sub>3</sub>.

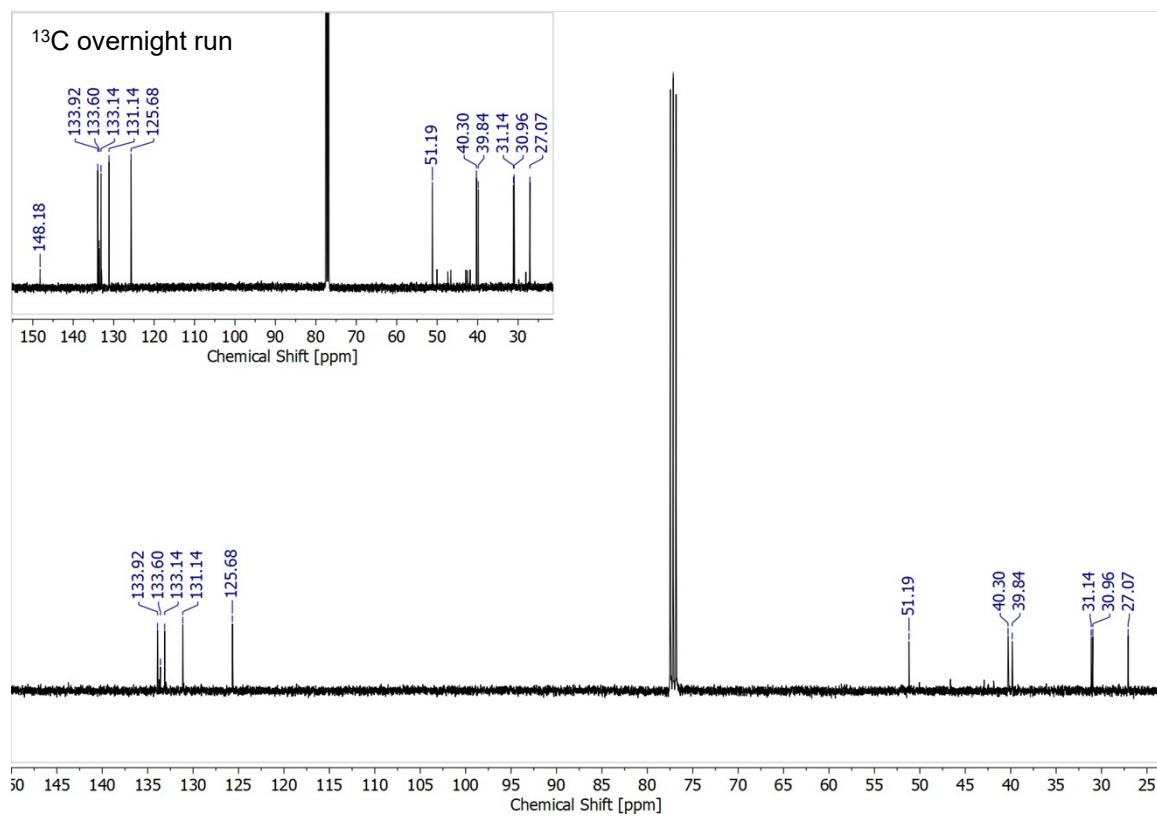

**Figure S2.** <sup>13</sup>C NMR spectrum of compound **3** in CDCl<sub>3</sub>.



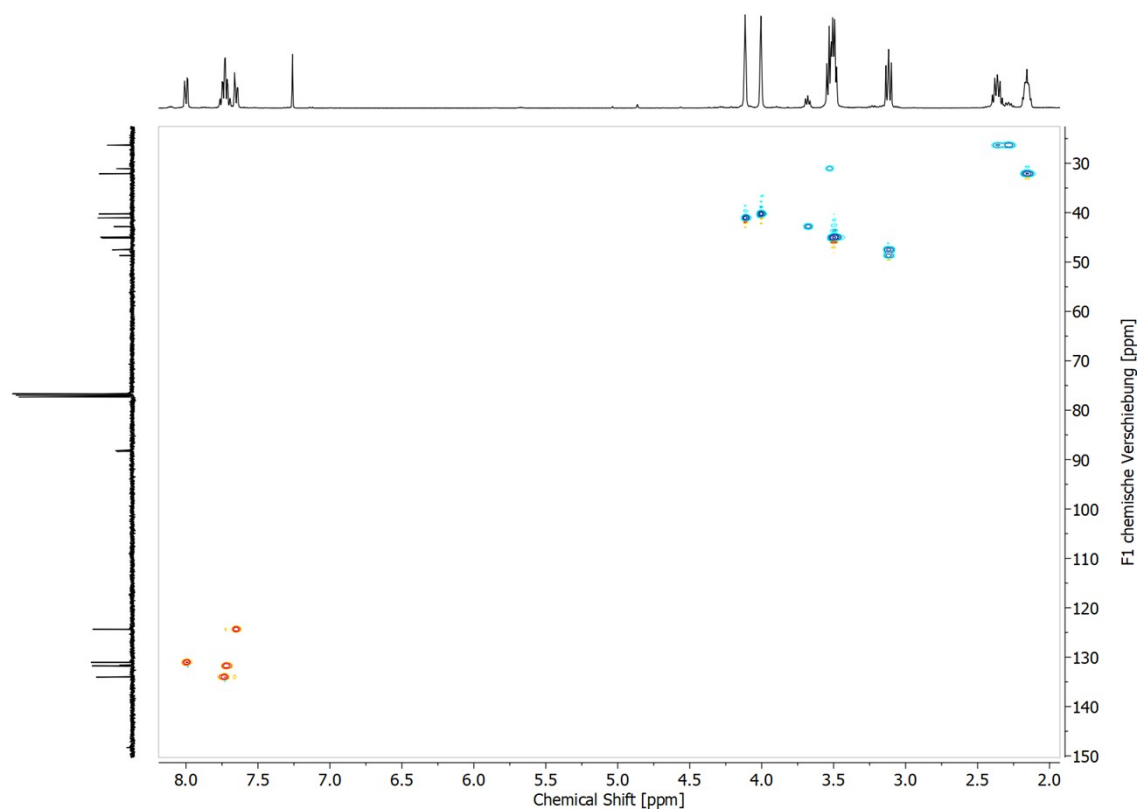

**Figure S5.** HSQC spectrum of compound **5** in CDCl<sub>3</sub>.

8-(3-(Bis(pyridin-2-ylmethyl)amino)propanesulfonyl)-4-nosyl-4,8-diazacyclononyne (**6**)

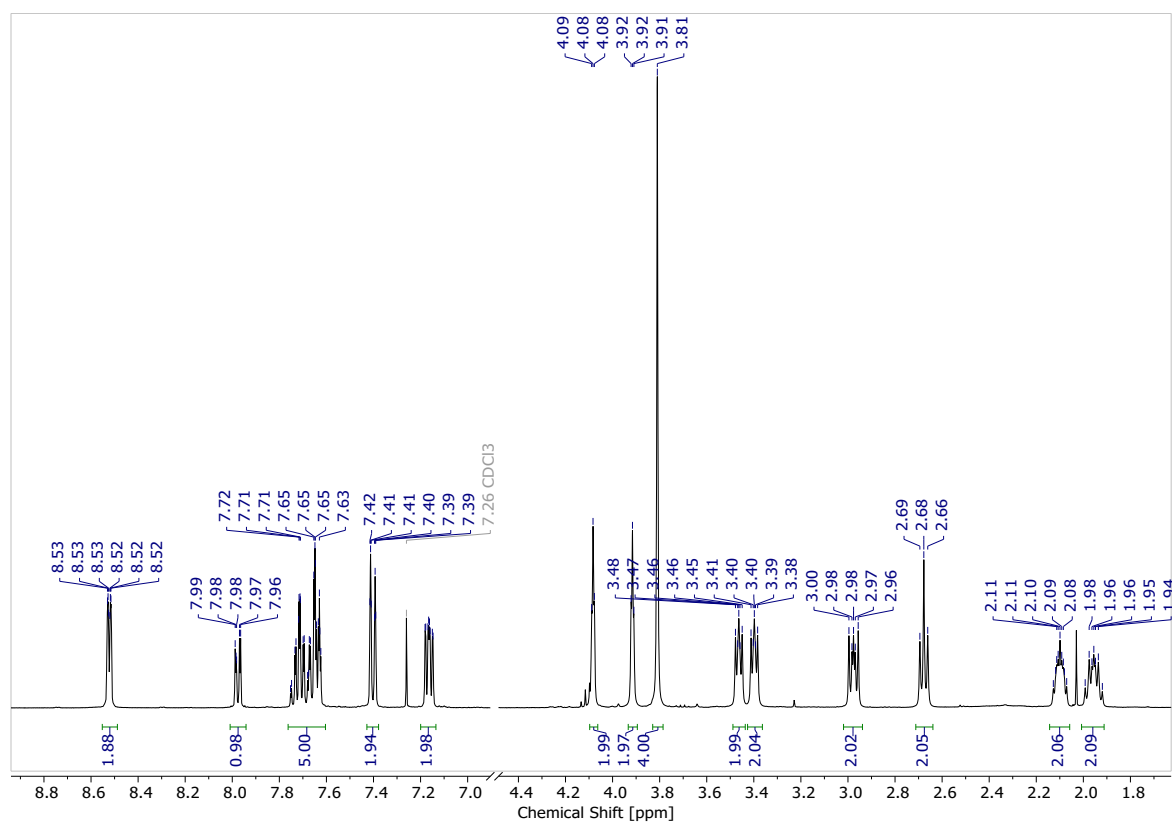

Figure S6. <sup>1</sup>H NMR spectrum of compound **6** in CDCl<sub>3</sub>.

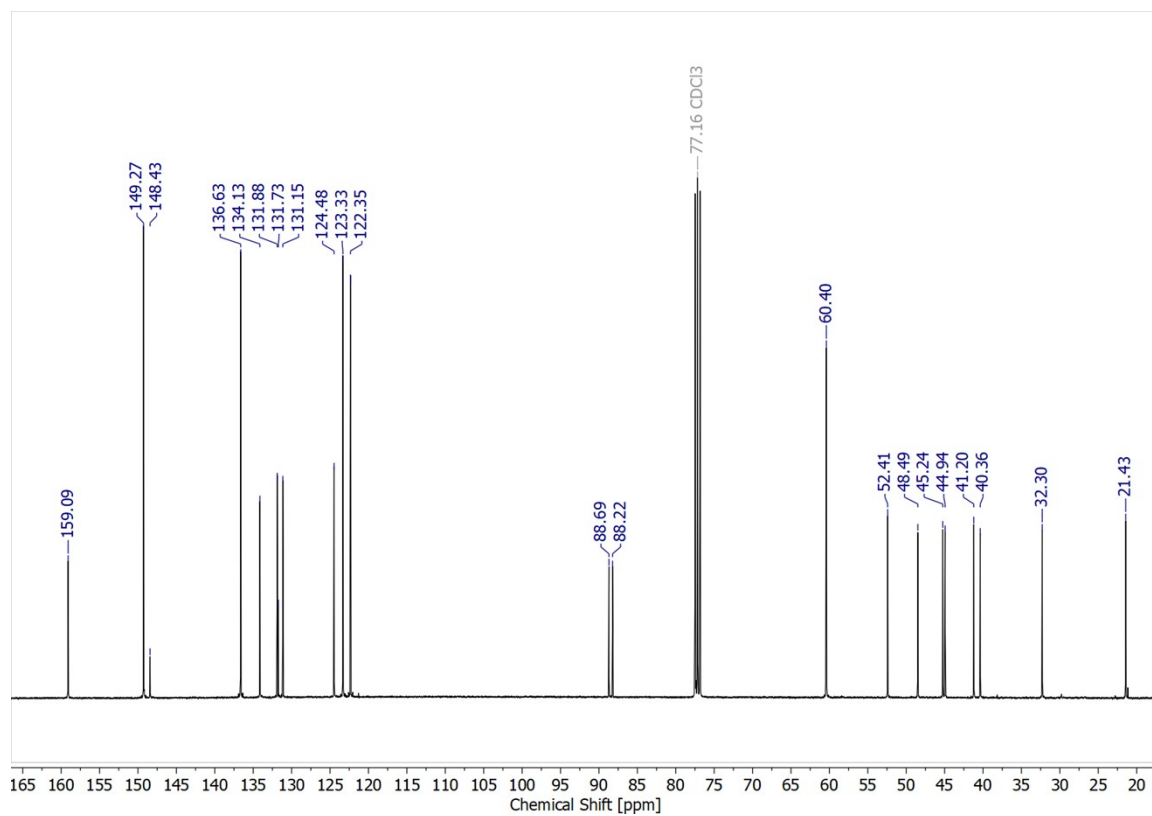

Figure S7. <sup>13</sup>C NMR spectrum of compound **6** in CDCl<sub>3</sub>.

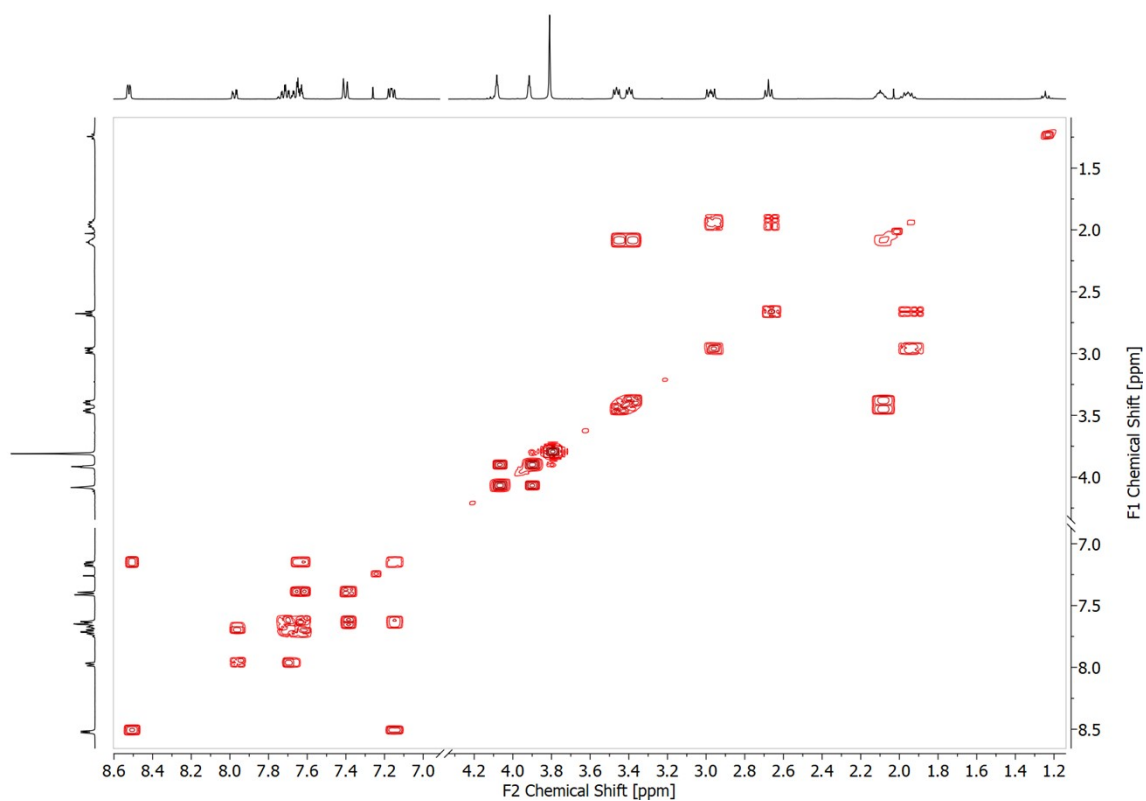

**Figure S8.** COSY spectrum of compound **6** in  $\text{CDCl}_3$ .

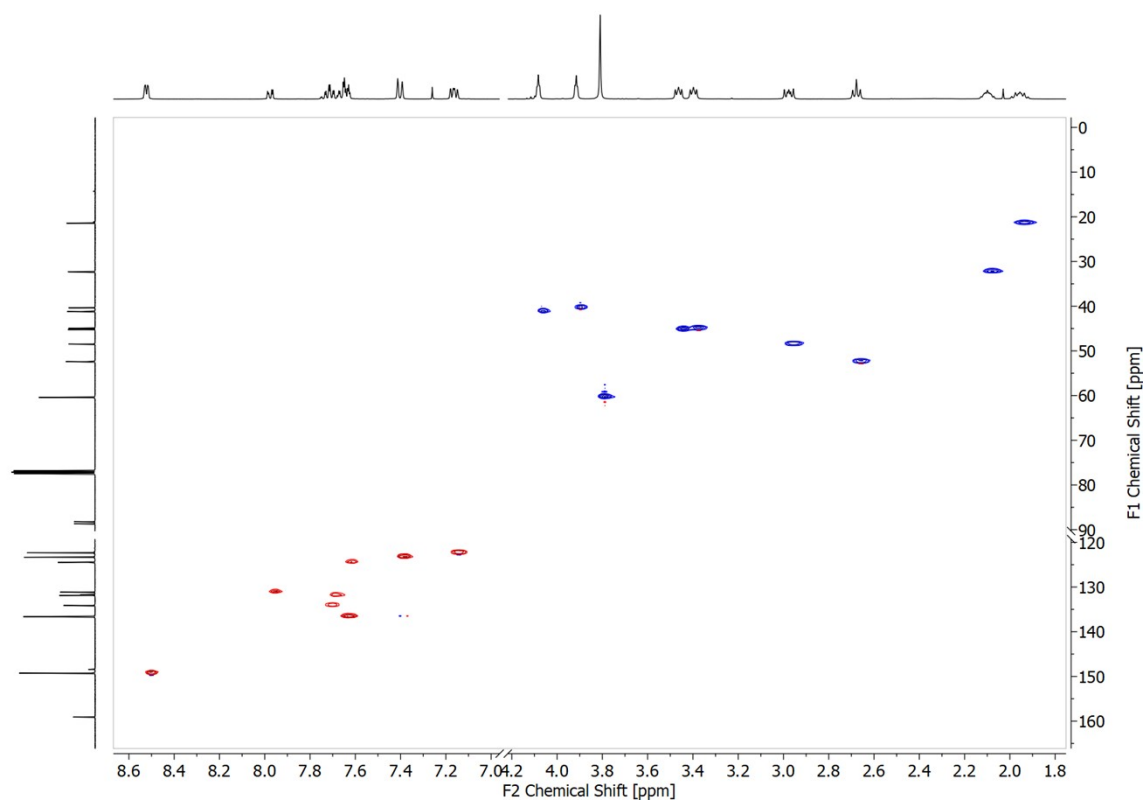

**Figure S9.** HSQC spectrum of compound **6** in  $\text{CDCl}_3$ .



4-(Bis(pyridin-2-ylmethyl)amino)methyl)benzoic acid ethyl ester (**8**)

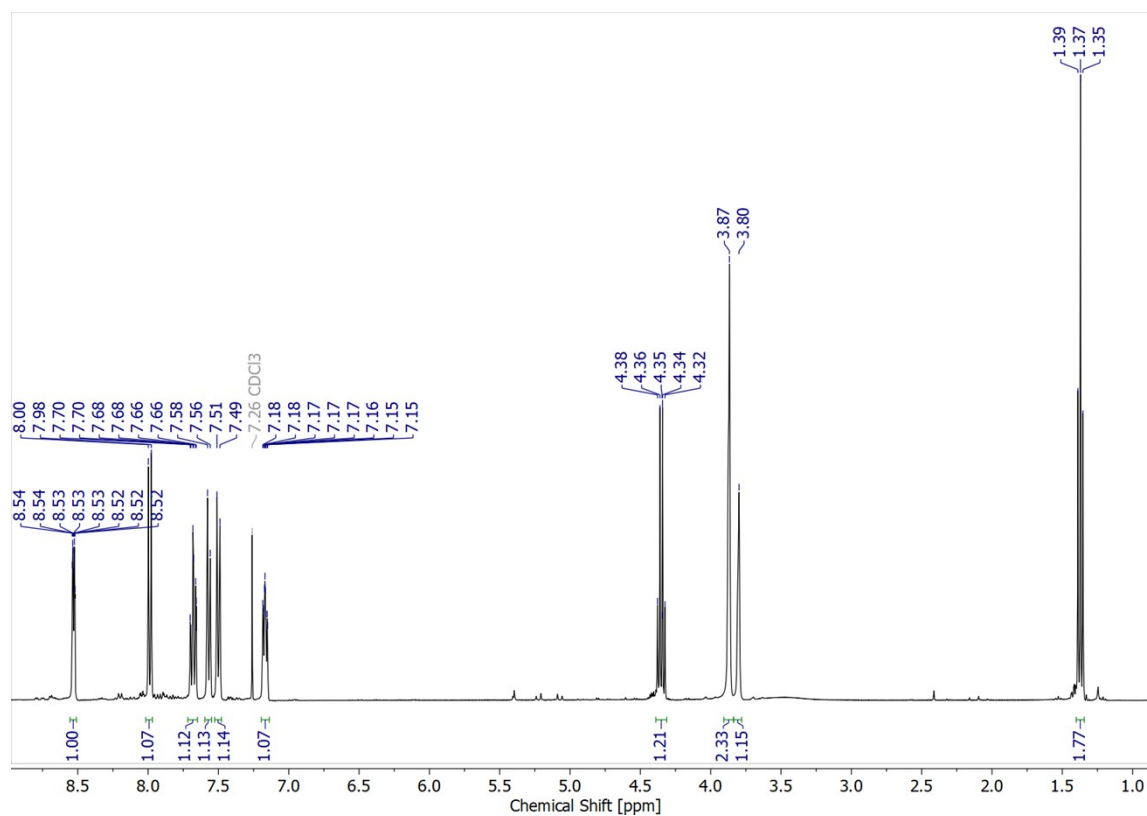

Figure S10. <sup>1</sup>H NMR spectrum of compound **8** in CDCl<sub>3</sub>.

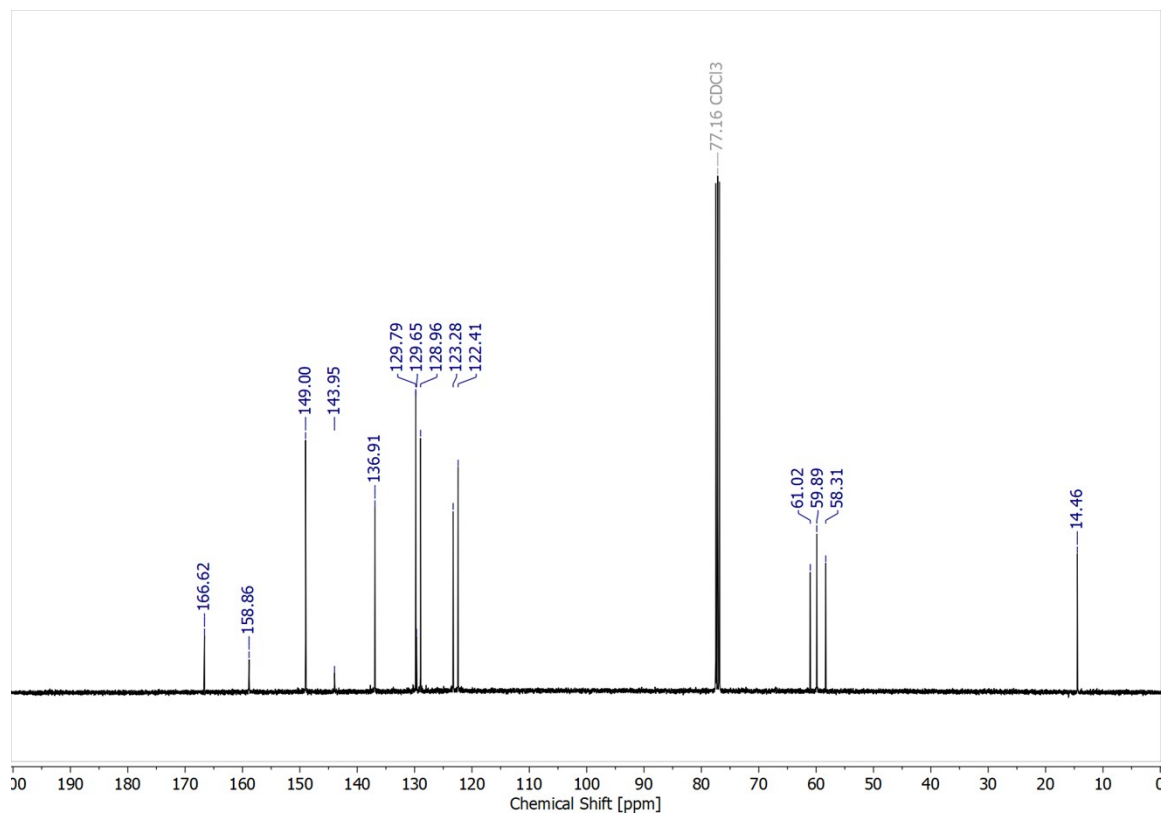

Figure S11. <sup>13</sup>C NMR spectrum of compound **8** in CDCl<sub>3</sub>.

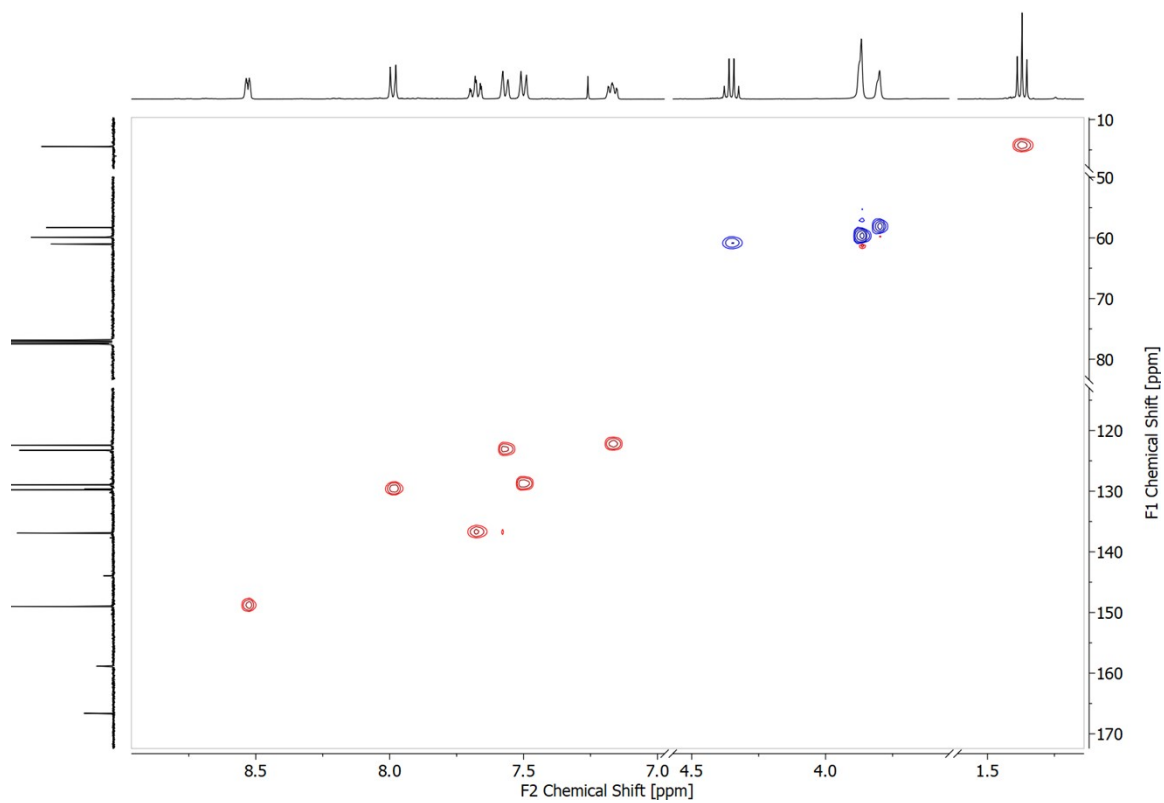

**Figure S12.** HSQC NMR spectrum of compound **8** in CDCl<sub>3</sub>.

4-(Bis(pyridin-2-ylmethyl)amino)methyl)benzoic acid (**9**)

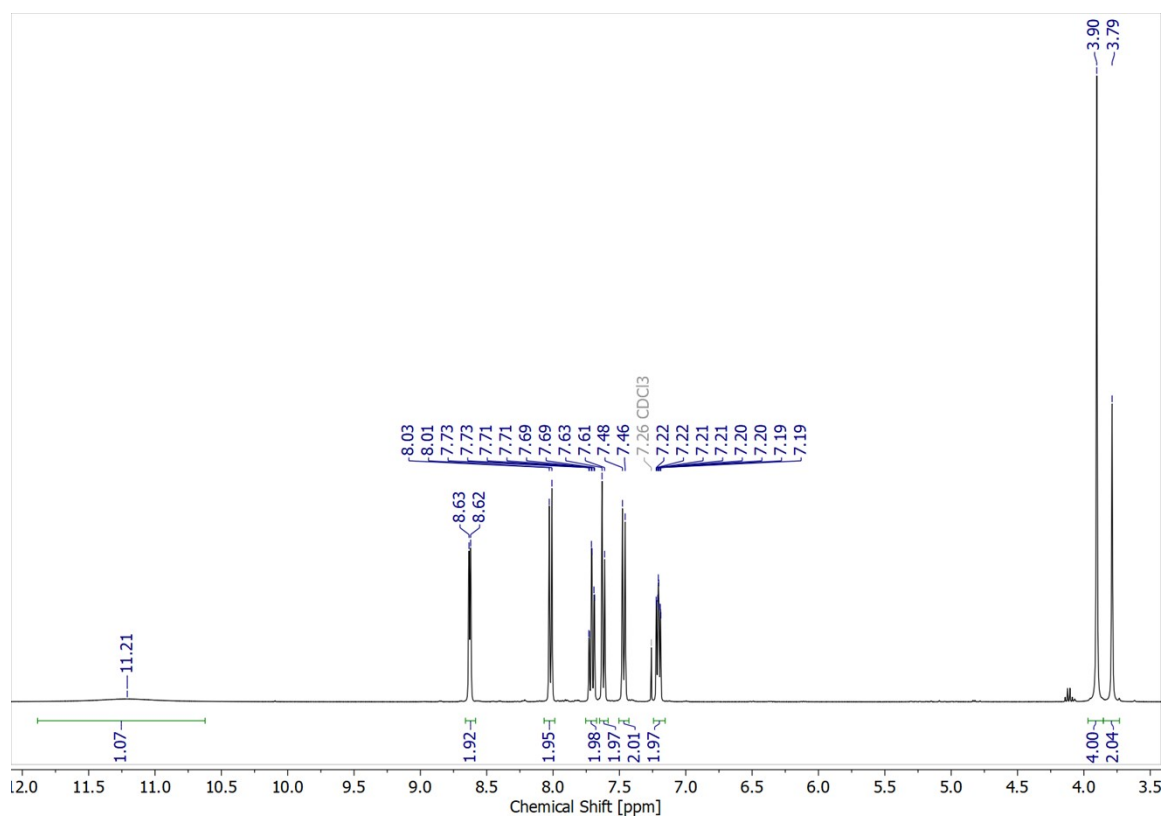

Figure S13. <sup>1</sup>H NMR spectrum of compound **9** in CDCl<sub>3</sub>.

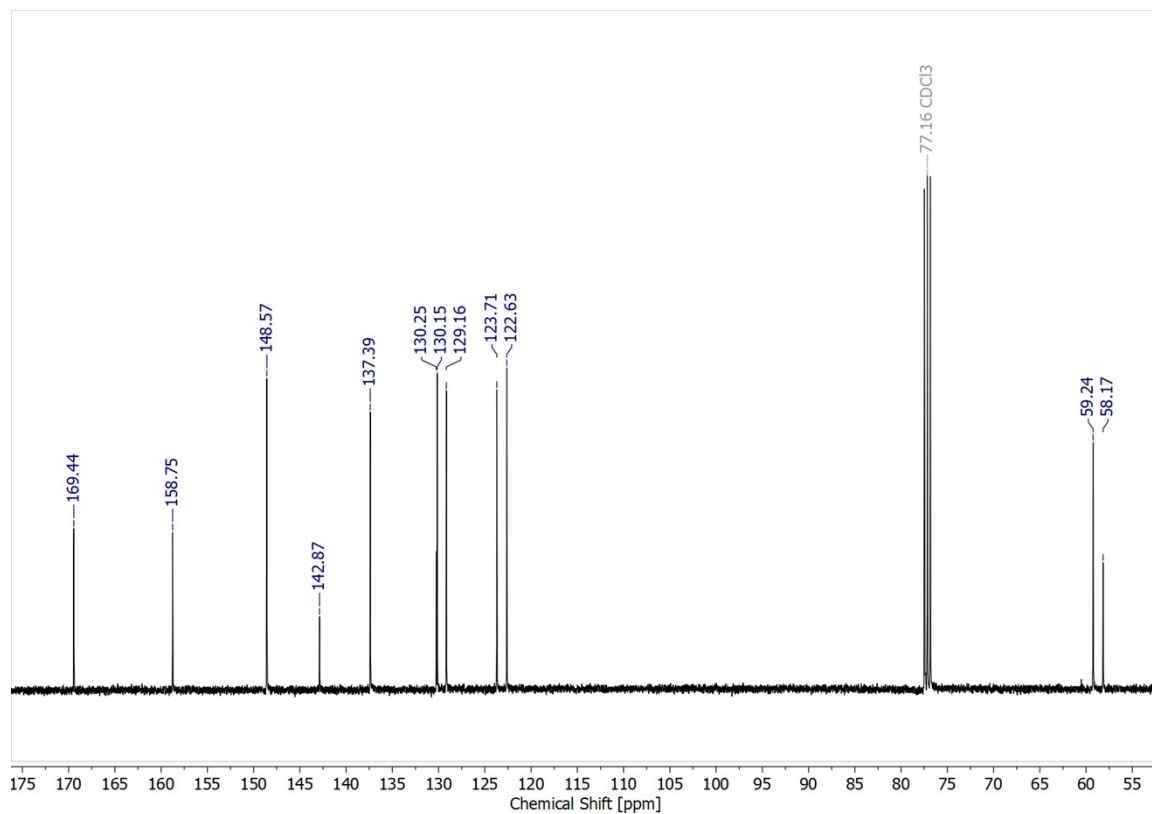

Figure S14. <sup>13</sup>C NMR spectrum of compound **9** in CDCl<sub>3</sub>.

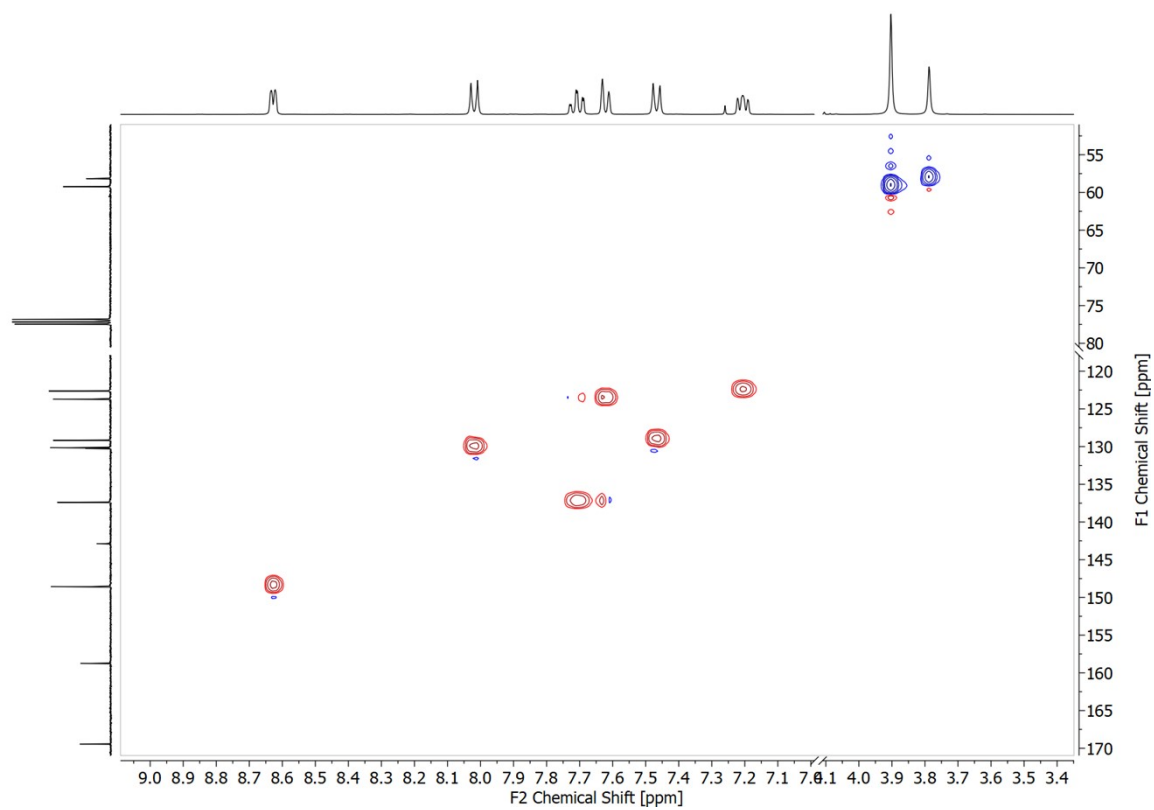

**Figure S15.** HSQC NMR spectrum of compound **9** in CDCl<sub>3</sub>.

4-(Bis(pyridin-2-ylmethyl)amino)methyl)benzoic acid 2,3,5,6-tetrafluorophenyl ester (**10**)

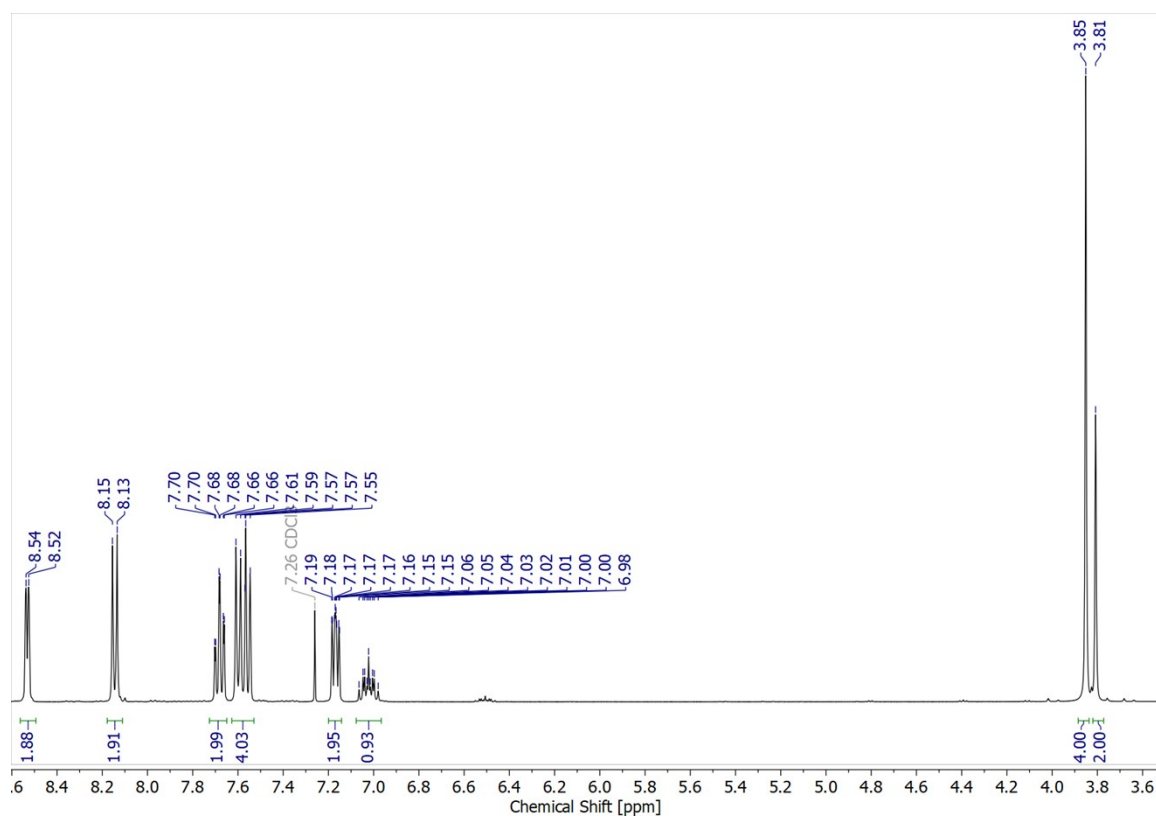

Figure S16. <sup>1</sup>H NMR spectrum of compound **10** in CDCl<sub>3</sub>.

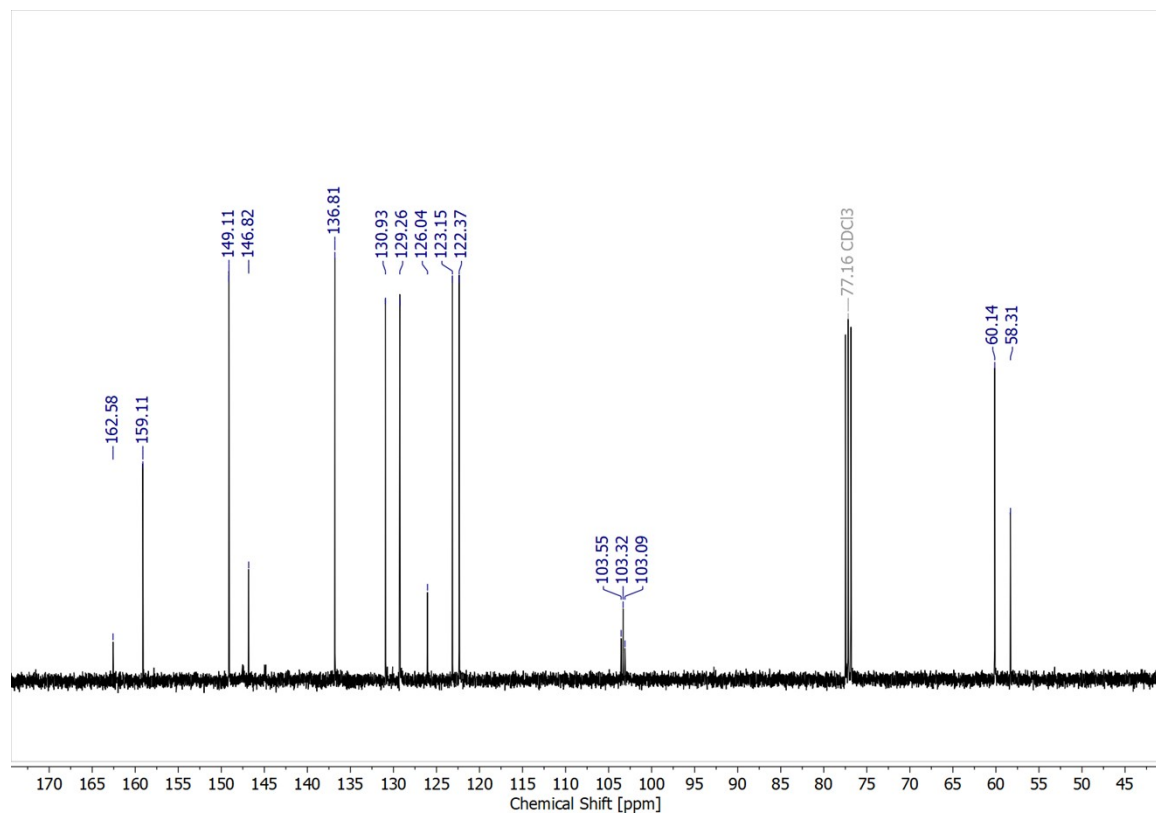

Figure S17. <sup>13</sup>C NMR spectrum of compound **10** in CDCl<sub>3</sub>.

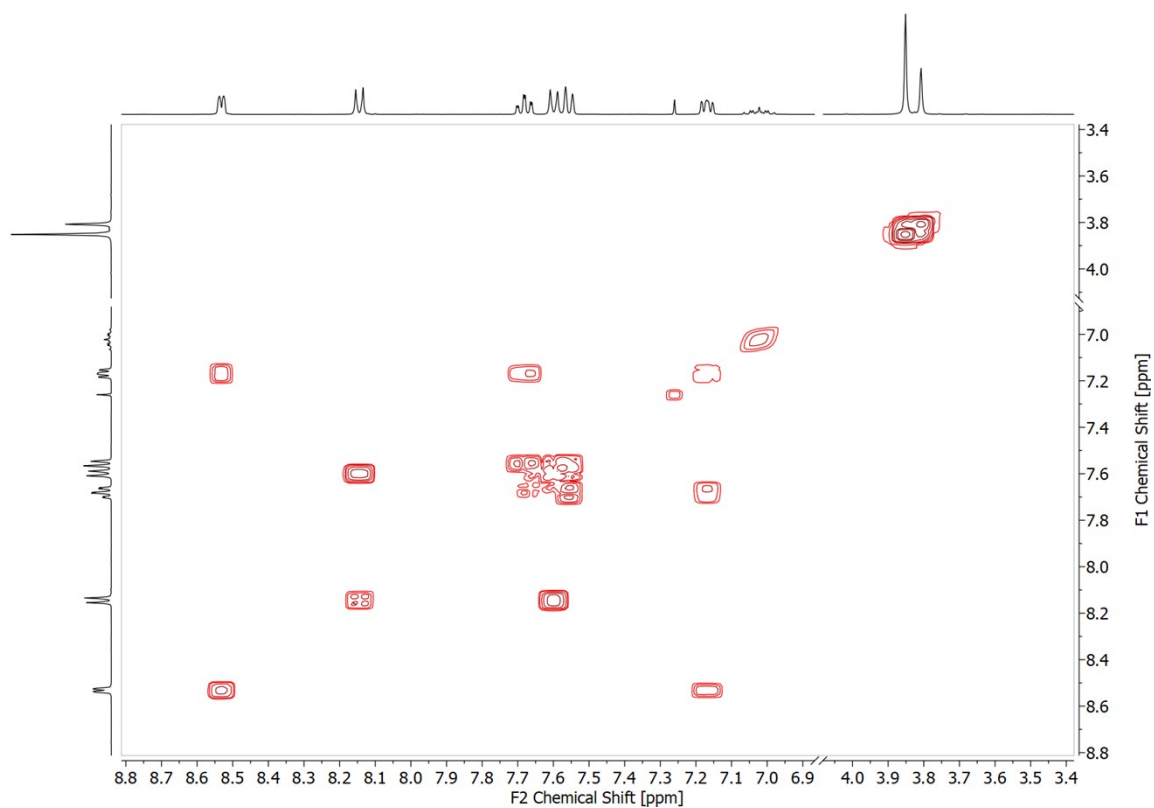

**Figure S18.** COSY NMR spectrum of compound **10** in  $\text{CDCl}_3$ .

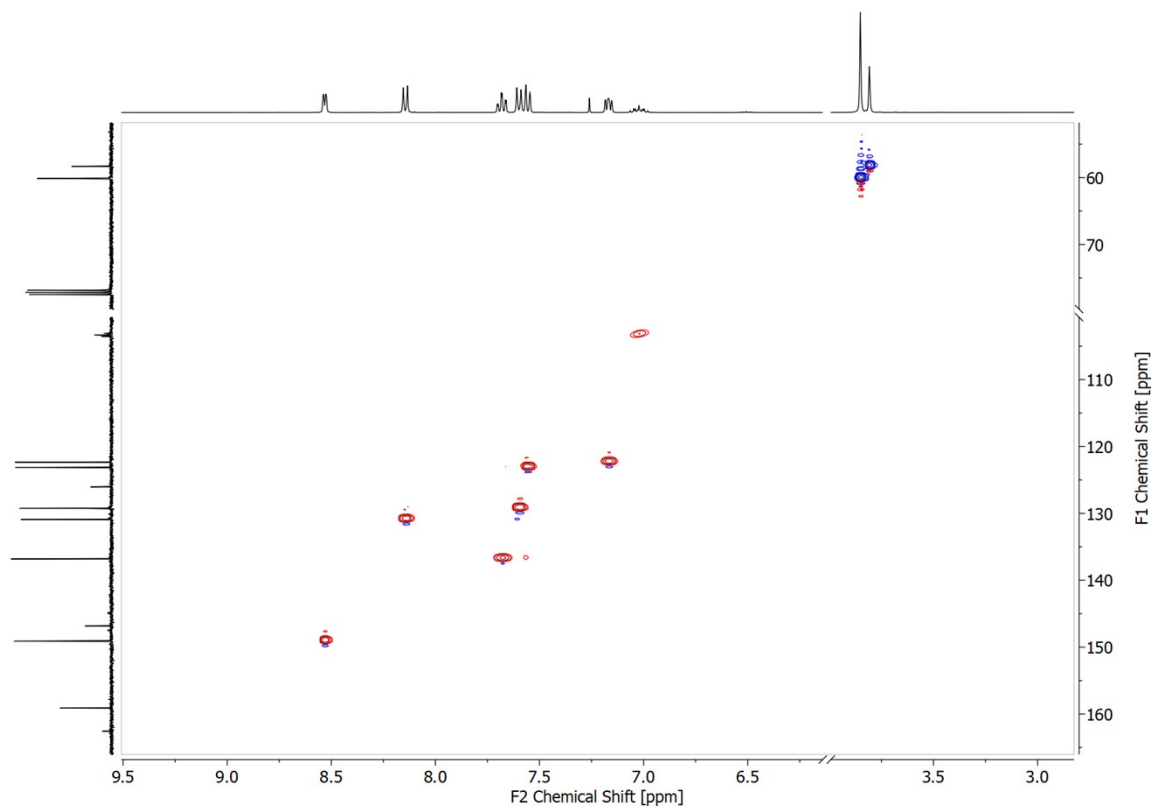

**Figure S19.** HSQC spectrum of compound **10** in  $\text{CDCl}_3$ .

[Re(CO)<sub>3</sub>6]Br (**11**)

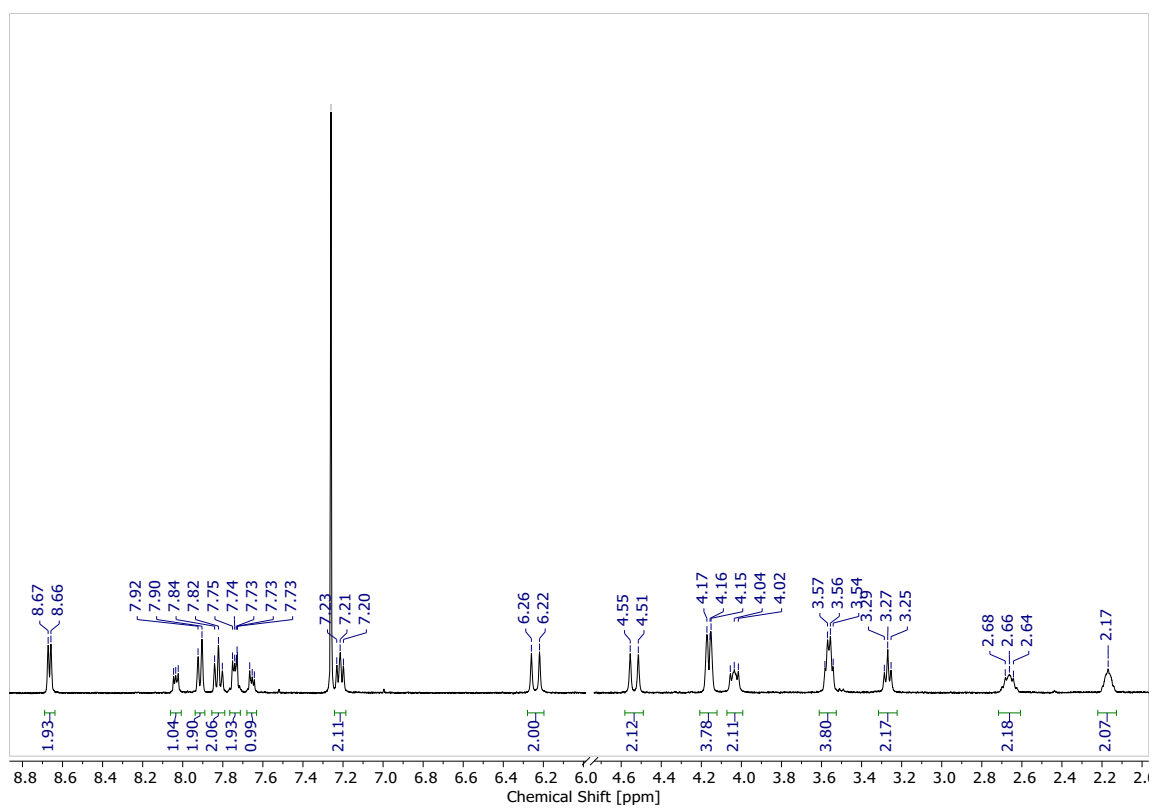

Figure S20. <sup>1</sup>H NMR spectrum of compound **11** in CDCl<sub>3</sub>.

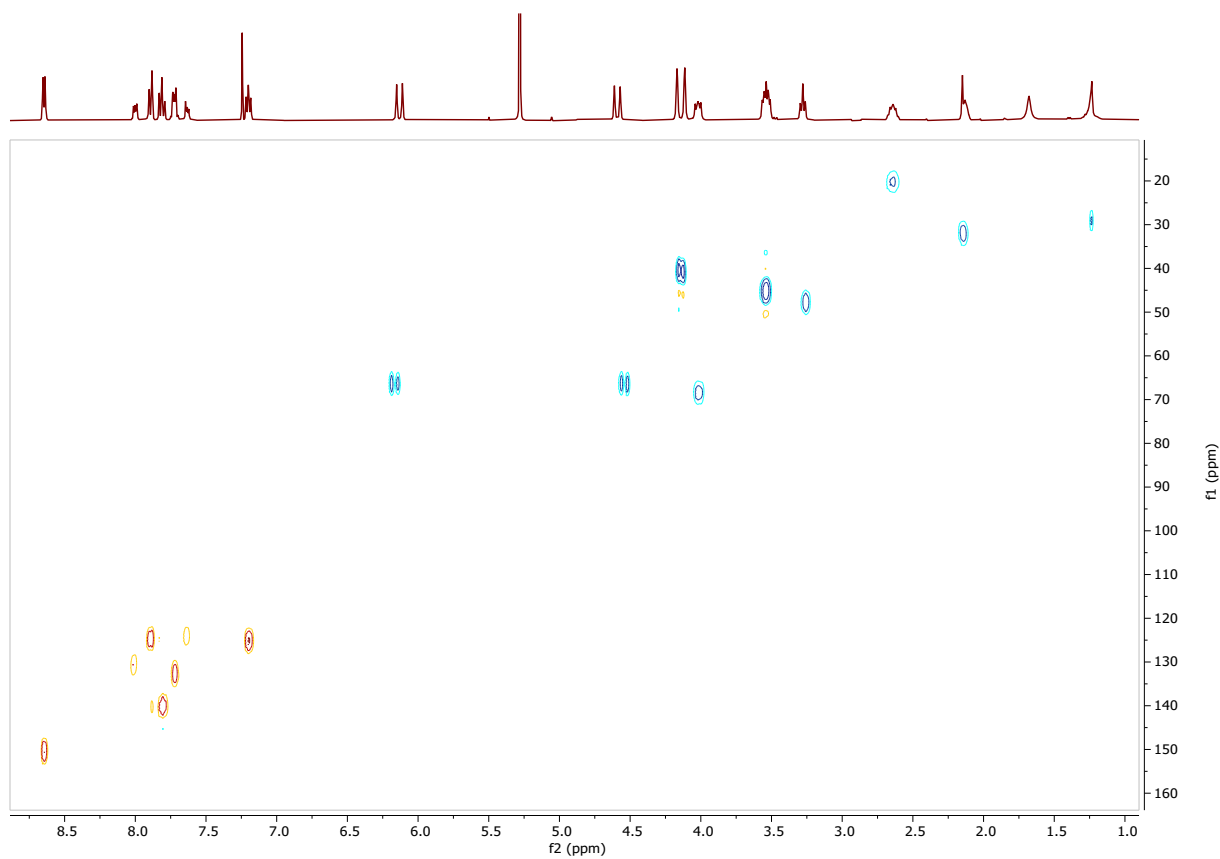

Figure S21. HSQC spectrum of compound **11** in CDCl<sub>3</sub>.

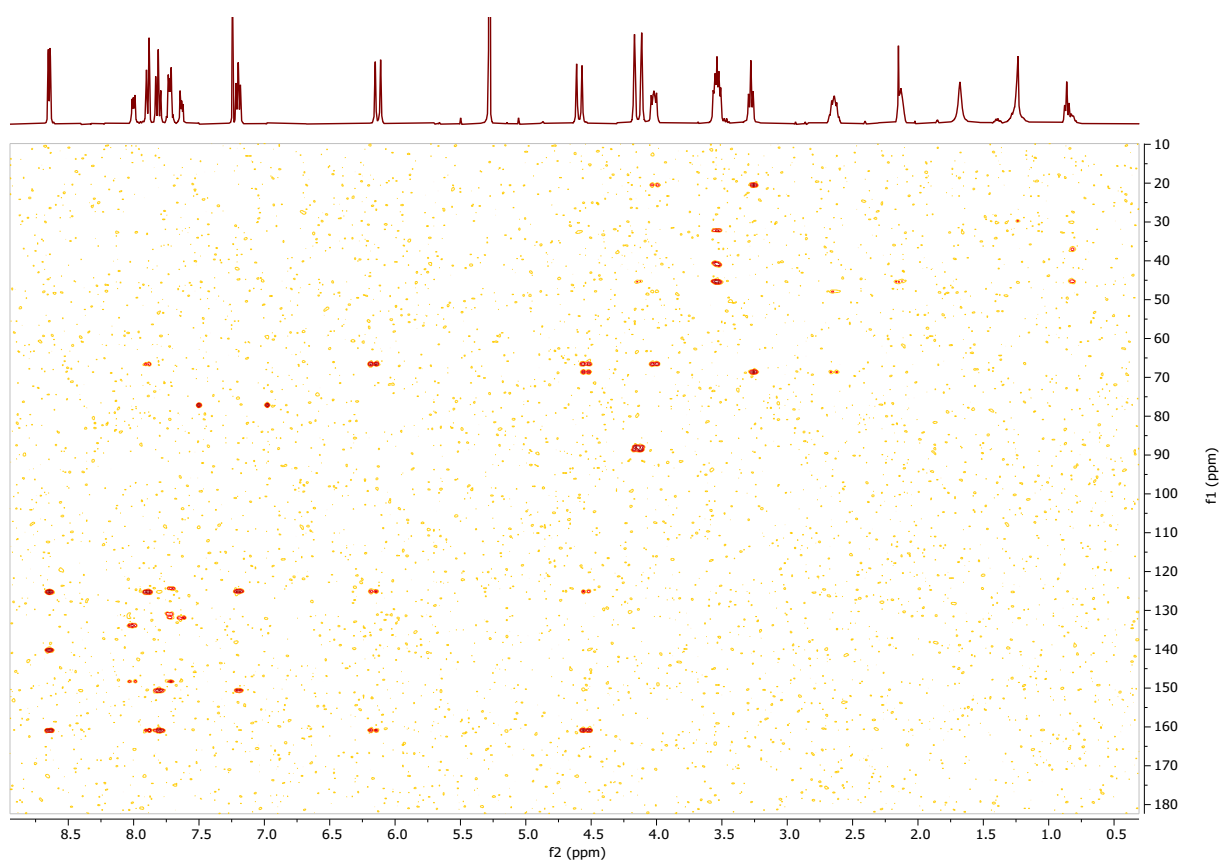

**Figure S22.** HMBC spectrum of compound **11** in  $\text{CDCl}_3$ .



[Re(CO)<sub>3</sub>10]Br (**12**)

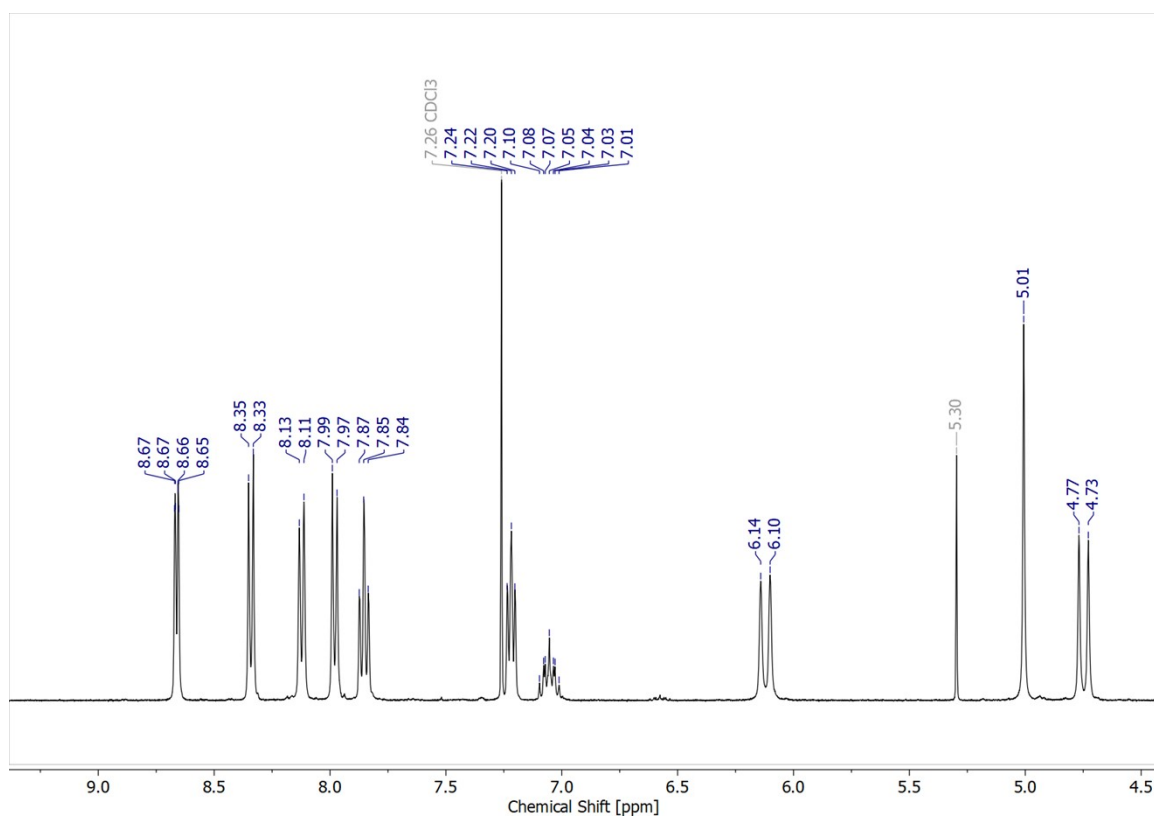

Figure S23. <sup>1</sup>H NMR spectrum of compound **12** in CDCl<sub>3</sub>.

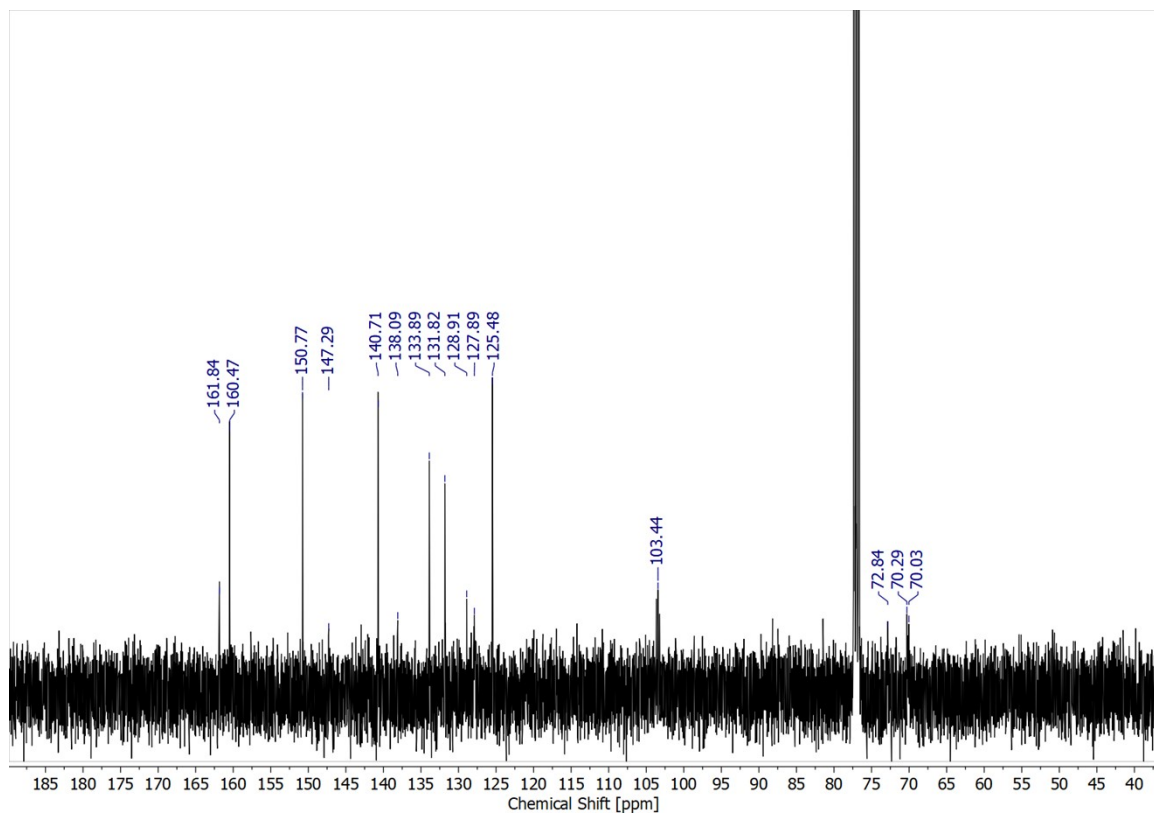

Figure S24. <sup>13</sup>C NMR spectrum of compound **12** in CDCl<sub>3</sub>.

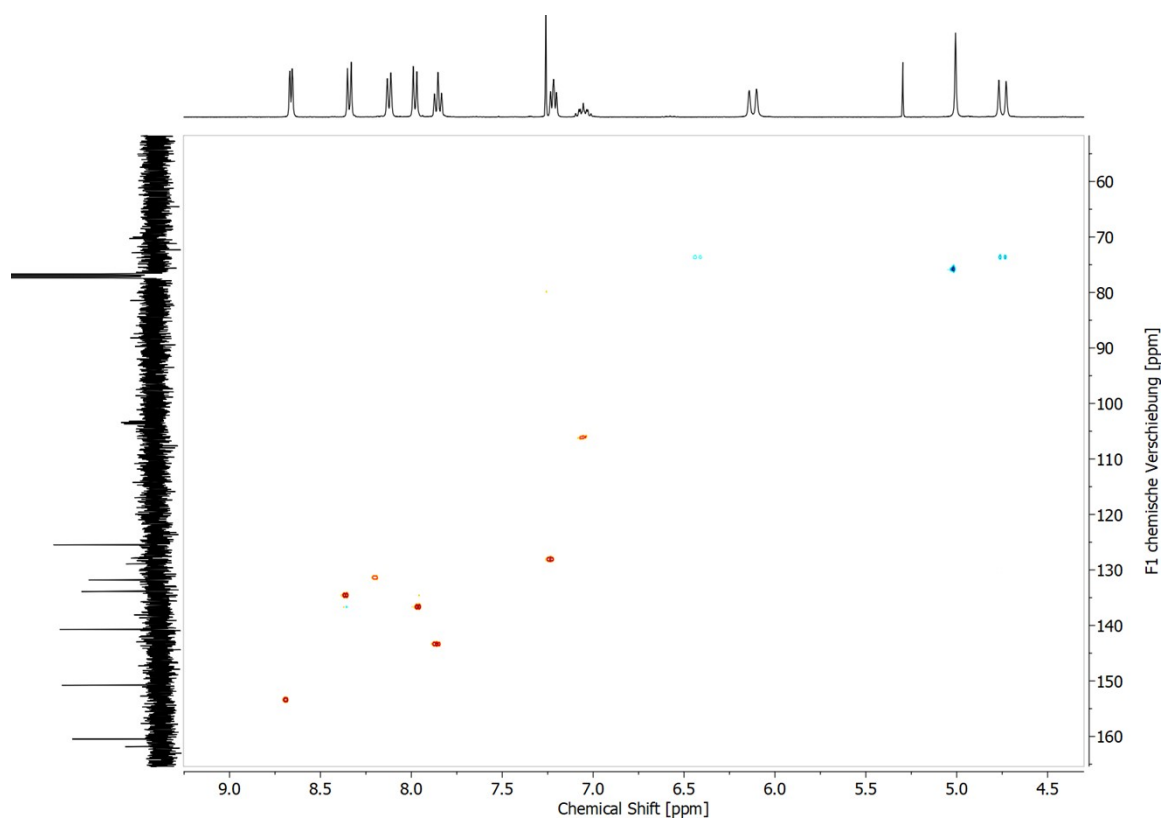

**Figure S25.** HSQC spectrum of compound **12** in  $\text{CDCl}_3$ .

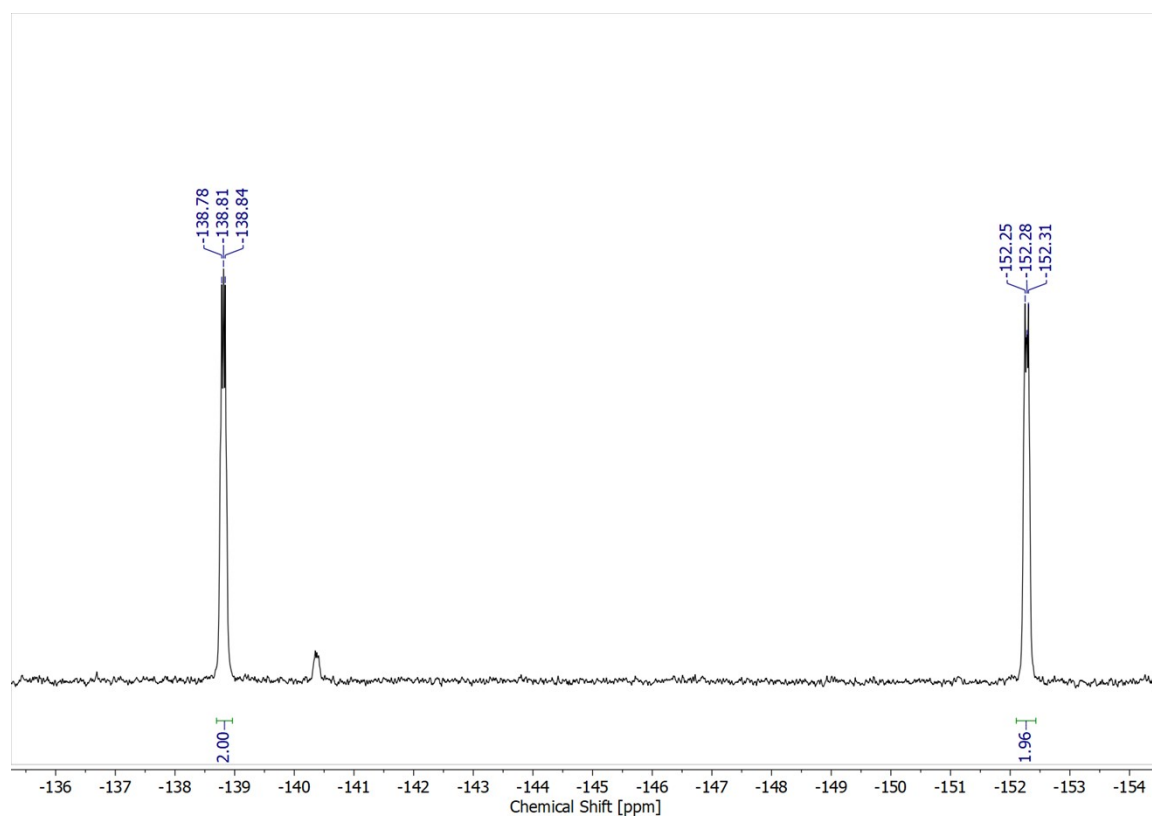

**Figure S26.**  $^{19}\text{F}$  NMR spectrum of compound **12** in  $\text{CDCl}_3$ .

## Synthesis of the functionalized PSMA-derivatives PSMA-N<sub>3</sub> and PSMA-NH<sub>2</sub>

(in accordance to ref: Cancers 2021, 13, 1974)

*Di-tert-butyl (((S)-6-((S)-2-((1*S*,4*R*)-4-((2-azidoacetamido)methyl)cyclohexane-1-carboxamido)-3-(naphthalen-2-yl)propanamido)-1-(tert-butoxy)-1-oxohexan-2-yl)carbamoyl)-L-glutamate SI-1*

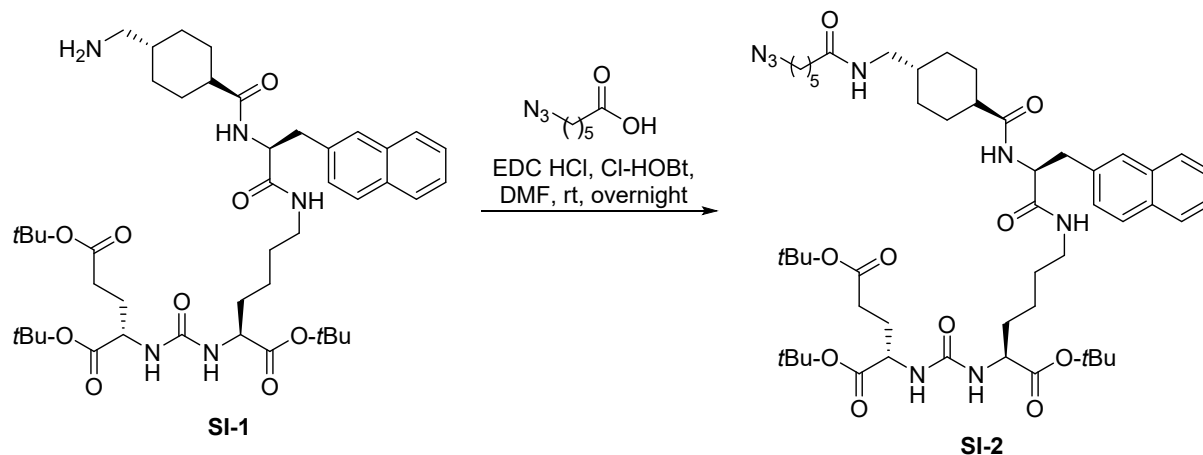

Compound **SI-1** (403 mg, 0.49 mmol, 1.00 eq.), 6-azido-hexanoic acid (92 mg, 0.59 mmol, 1.20 eq.), Cl-HOBT (97 mg, 0.64 mmol, 1.20 eq.) and EDC·HCl (122 mg, 0.64 mmol, 1.20 eq.) were dissolved in anhydrous DMF (10 mL) and the resulting mixture was allowed to stir at rt overnight. After HPLC control, the solvent was removed, and the crude product was purified by automated flash column chromatography ( $\text{CHCl}_3/\text{EtOH}$  10/0  $\rightarrow$  9/1) to yield compound **SI-2** as yellowish solid (166 mg, 35%).

$R_f$  (EtOAc v/v) = 0.34.

HPLC (Agilent C18 column, solvent A: water + 0.1% TFA, solvent B: acetonitrile + 0.1% TFA, flow rate: 1 mL/min, gradient: A/B 90/10  $\rightarrow$  5/95 in 14 min):  $t_R$  = 14.5 min. MS (ESI+):  $m/z$  = 964 [M+H]<sup>+</sup>.  $\text{C}_{51}\text{H}_{78}\text{N}_8\text{O}_{10}$  (963.23).

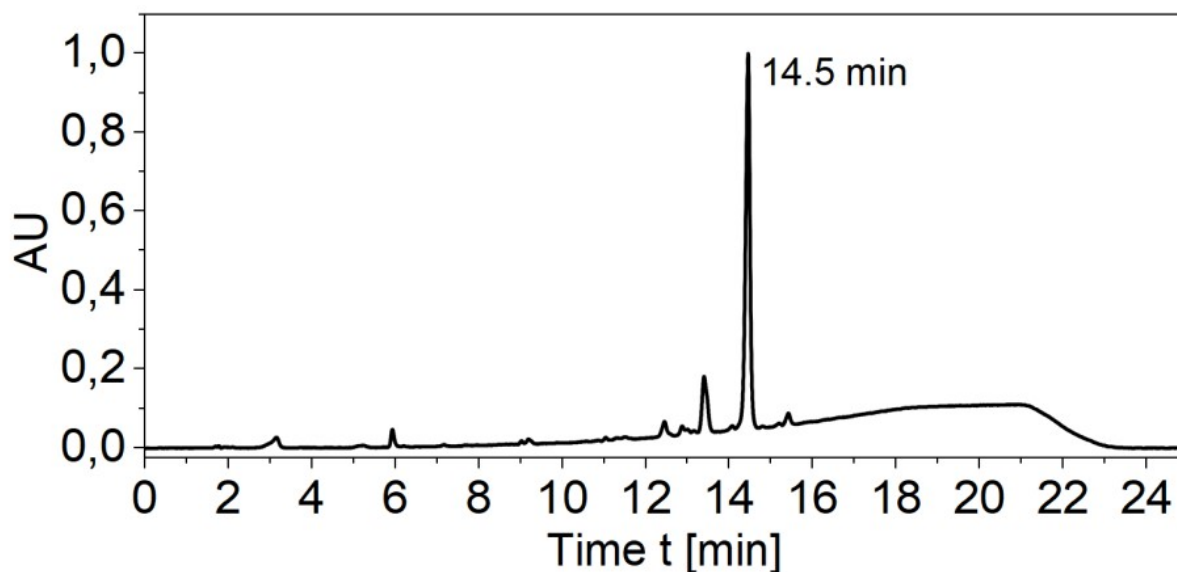

(((S)-5-((S)-2-((1*S*,4*R*)-4-((2-Azidoacetamido)methyl)cyclohexane-1-carboxamido)-3-(naphthalen-2-yl)propanamido)-1-carboxypentyl)carbamoyl)-L-glutamic acid **PSMA-N<sub>3</sub>**

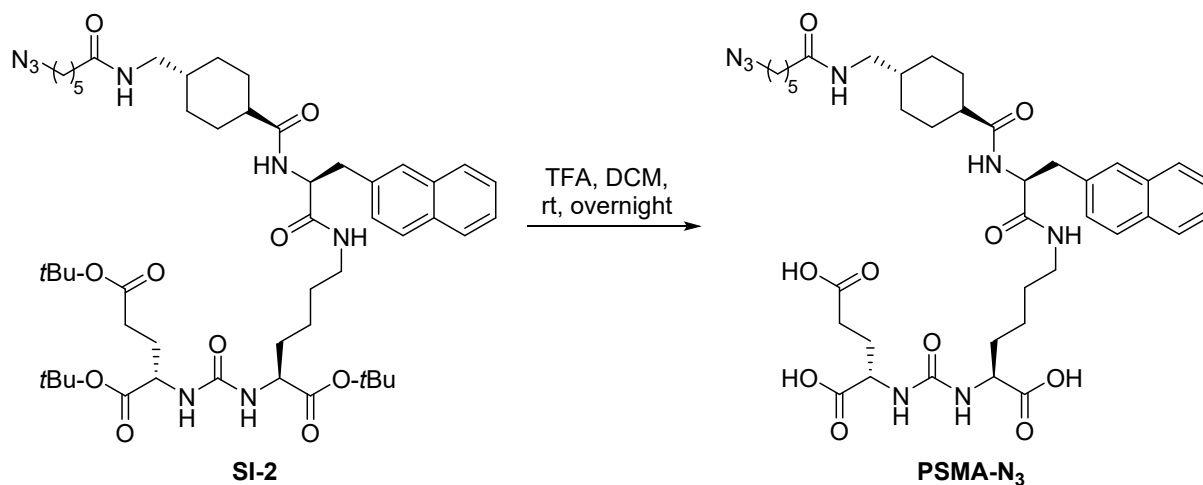

**SI-2** (116 mg, 0.12 mmol, 1.00 eq.) was dissolved in anhydrous DCM (8 mL), TfOH (7 mL) was added and the mixture was allowed to stir at rt overnight. Afterwards, the solvent was removed in an argon stream, the crude product was precipitated with ice-cold diethyl ether, and washed with ice-cold n-hexane (2 x 10 mL) and chloroform (2 x 10 mL). The crude product was purified via preparative HPLC (Method (2) in Table 5.1,  $t_R = 12.9$  min) and dried via lyophilization to afford **PSMA-N<sub>3</sub>** as white solid (22 mg, 23%).

HPLC:  $t_R = 10.0$  min (Agilent C18 column, solvent A: water + 0.1% TFA, solvent B: acetonitrile + 0.1% TFA, flow rate: 1 mL/min, gradient: A/B 90/10  $\rightarrow$  5/95 in 14 min),  $t_R = 16.6$  min (Phenomenex C12 column, solvent A: water + 0.1% TFA, solvent B: acetonitrile + 0.1% TFA, flow rate: 1 mL/min, gradient: A/B 95/5  $\rightarrow$  5/95 in 20 min). MS (ESI+):  $m/z = 796$  [M+H]<sup>+</sup>. C<sub>39</sub>H<sub>54</sub>N<sub>8</sub>O<sub>10</sub> (794.91).

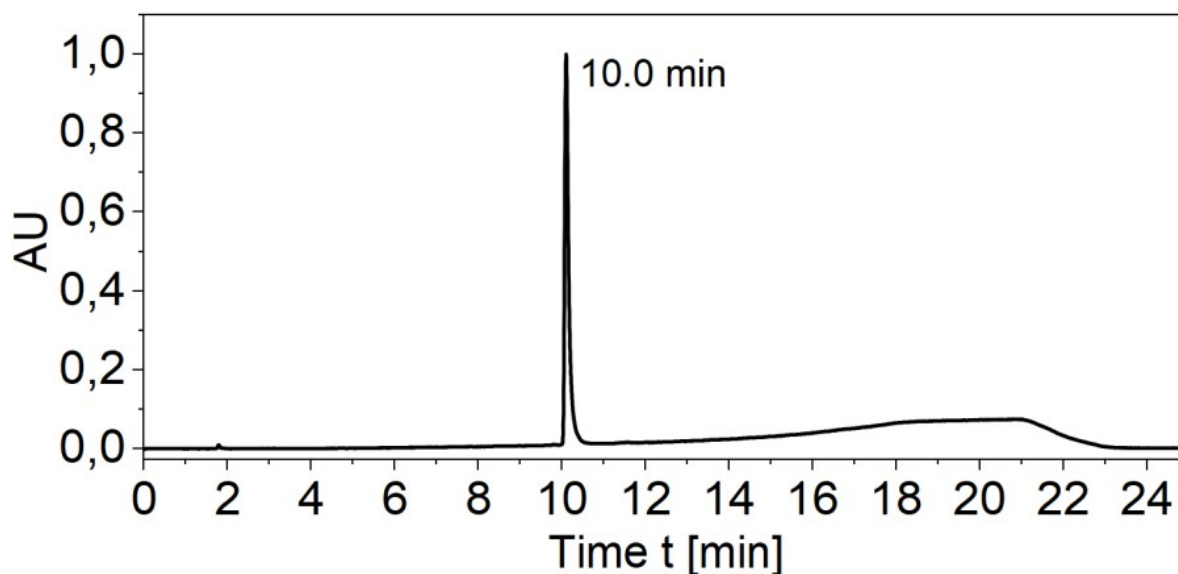

*(((S)-5-(((S)-2-(((1S,4R)-4-(aminomethyl)cyclohexane-1-carboxamido)-3-(naphthalen-2-yl)propanamido)-1-carboxypentyl)carbamoyl)-L-glutamic acid **PSMA-NH<sub>2</sub>***

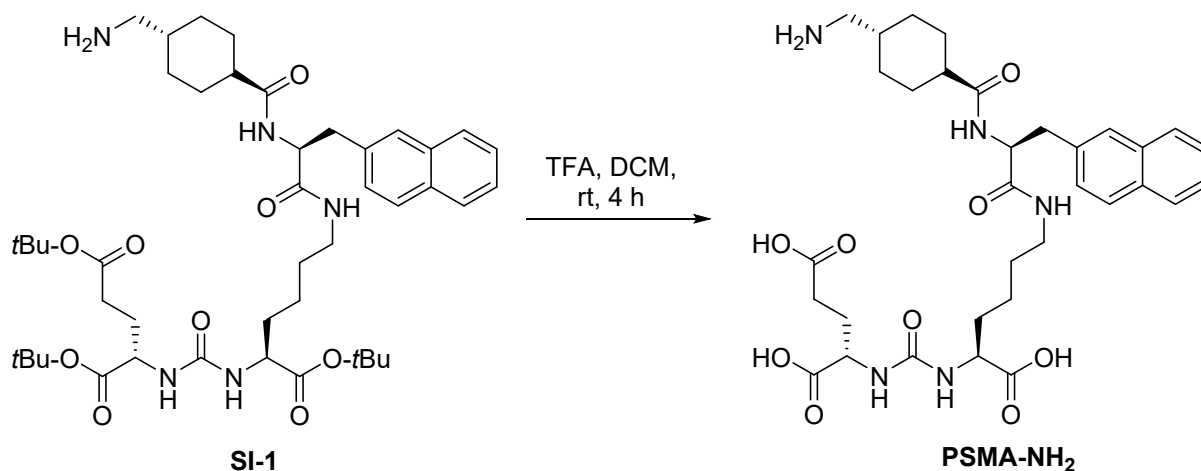

Compound **SI-1** (50 mg, 60.7  $\mu\text{mol}$ , 1.00 eq.) was dissolved in anhydrous DCM (6mL), TFOH (4 mL) was added, and the mixture was stirred at room temperature for 4 h. Afterwards, the solvent and the remaining TFA were removed in an argon stream, and the crude product was purified via preparative HPLC (Agilent C18 column, solvent A: water + 0.1% TFA, solvent B: acetonitrile + 0.1% TFA, flow rate: 6 mL/min, gradient: 85/15  $\rightarrow$  40/60 in 35 min,  $t_R$  = 6.1 min) and dried via lyophilization to afford **PSMA-NH<sub>2</sub>** as white solid (34 mg, 85%).

HPLC:  $t_R$  = 7.7 min (Agilent C18 column, solvent A: water + 0.1% TFA, solvent B: acetonitrile + 0.1% TFA, flow rate: 1 mL/min, gradient: A/B 90/10  $\rightarrow$  5/95 in 14 min);  $t_R$  = 12.9 min (Phenomenex C12 column, solvent A: water + 0.1% TFA, solvent B: acetonitrile + 0.1% TFA, flow rate: 1 mL/min, gradient: A/B 95/5  $\rightarrow$  5/95 in 20 min). MS (ESI+):  $m/z$  = 657 [M+H]<sup>+</sup>. C<sub>33</sub>H<sub>45</sub>N<sub>5</sub>O<sub>9</sub> (655.75).

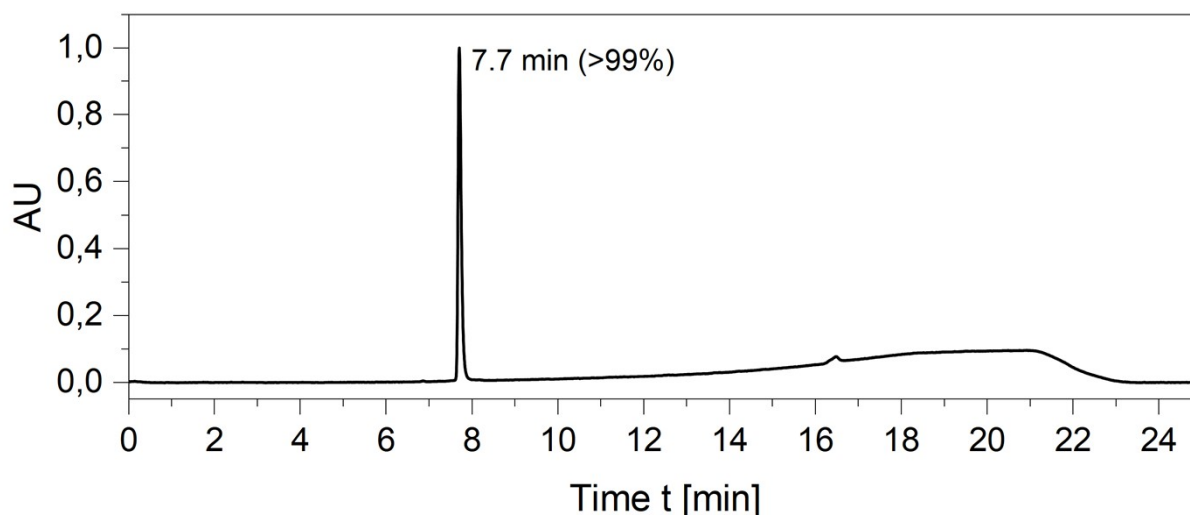

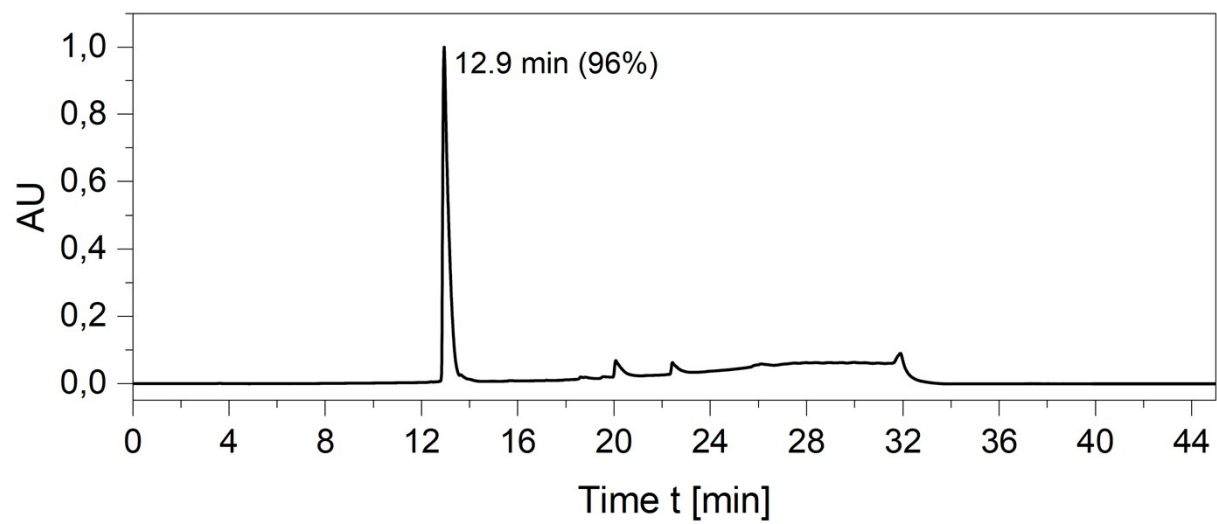

## Copper-free strain-promoted cycloaddition between PSMA-N<sub>3</sub> and <sup>nat</sup>Re-DPA-DACN

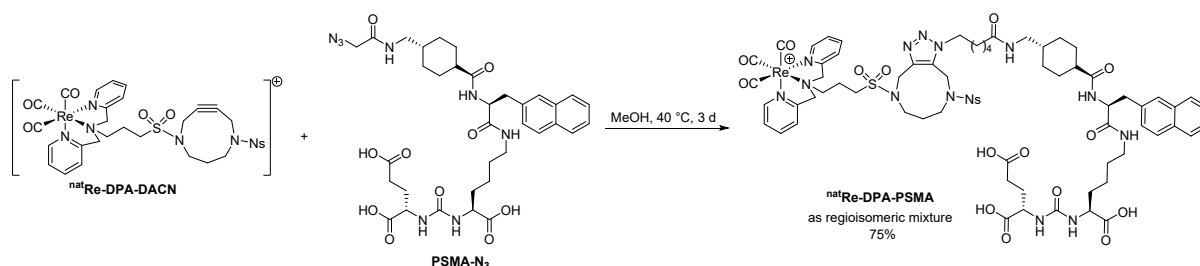

PSMA-N<sub>3</sub> (11.49 mg, 14.5 μmol, 1.01 eq.) and <sup>nat</sup>Re-DPA-DACN (12.74 mg, 14.4 μmol, 1.00 eq.) were dissolved in anhydrous MeOH (5 mL) and the reaction was stirred at 40 °C for 3 d. After reaction control by analytical HPLC analysis, the solvent was removed and the crude product was purified by preparative HPLC (Agilent C18 column, solvent A: water + 0.1% TFA, solvent B: acetonitrile + 0.1% TFA, flow rate: 6 mL/min, gradient: 70/30 → 30/70 in 35 min,  $t_R$  = 13.0 min). The product was dried by lyophilization to give <sup>nat</sup>Re-DPA-PSMA as white solid (18 mg, 75%).

HPLC:  $t_R$  = 11.3 min (Agilent C18 column, solvent A: water + 0.1% TFA, solvent B: acetonitrile + 0.1% TFA, flow rate: 1 mL/min, gradient: A/B 90/10 → 5/95 in 14 min),  $t_R$  = 17.6 min (Phenomenex C12 column, solvent A: water + 0.1% TFA, solvent B: acetonitrile + 0.1% TFA, flow rate: 1 mL/min, gradient: A/B 95/5 → 5/95 in 20 min).

MS (ESI+):  $m/z$  = 838 [M-Br+H]<sup>2+</sup> (<sup>185</sup>Re), 839 [M-Br+H]<sup>2+</sup> (<sup>187</sup>Re). C<sub>70</sub>H<sub>86</sub>BrN<sub>14</sub>O<sub>19</sub>ReS<sub>2</sub> (1757.77).

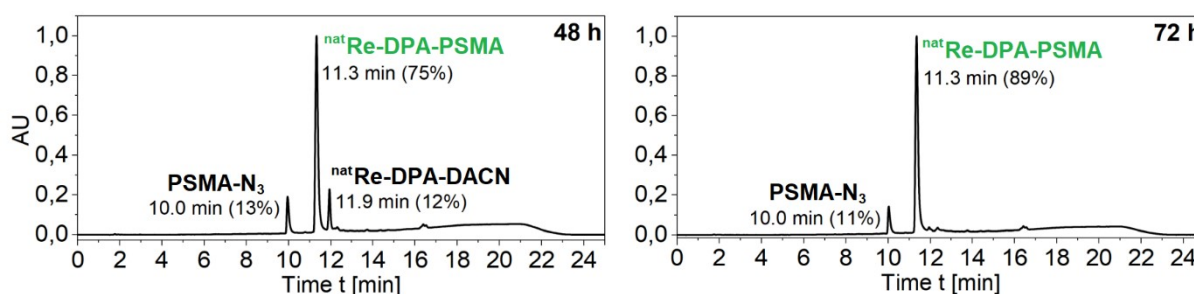

Reaction progress of the strain-promoted click reaction between for <sup>nat</sup>Re-DPA-DACN and PSMA-N<sub>3</sub> after 48 h and 72 h, respectively.

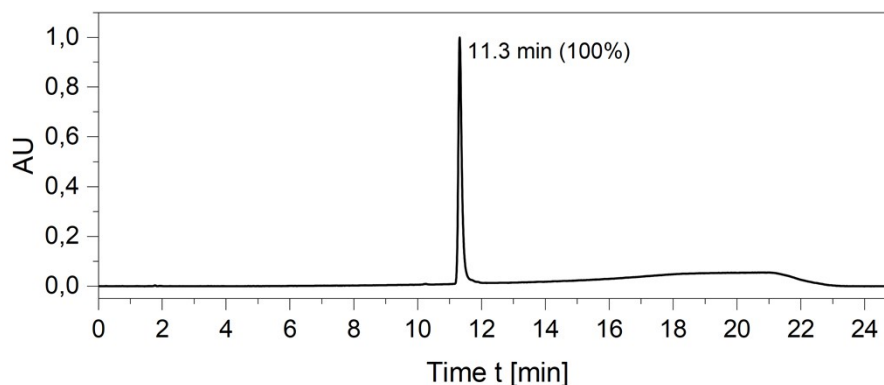

HPLC chromatogram of the purified clicked product <sup>nat</sup>Re-DPA-PSMA.

**$^{99m}\text{Tc}$ -Radiolabeling of DACN ligand 6 and SPAAC-labeling with PSMA- $\text{N}_3$**

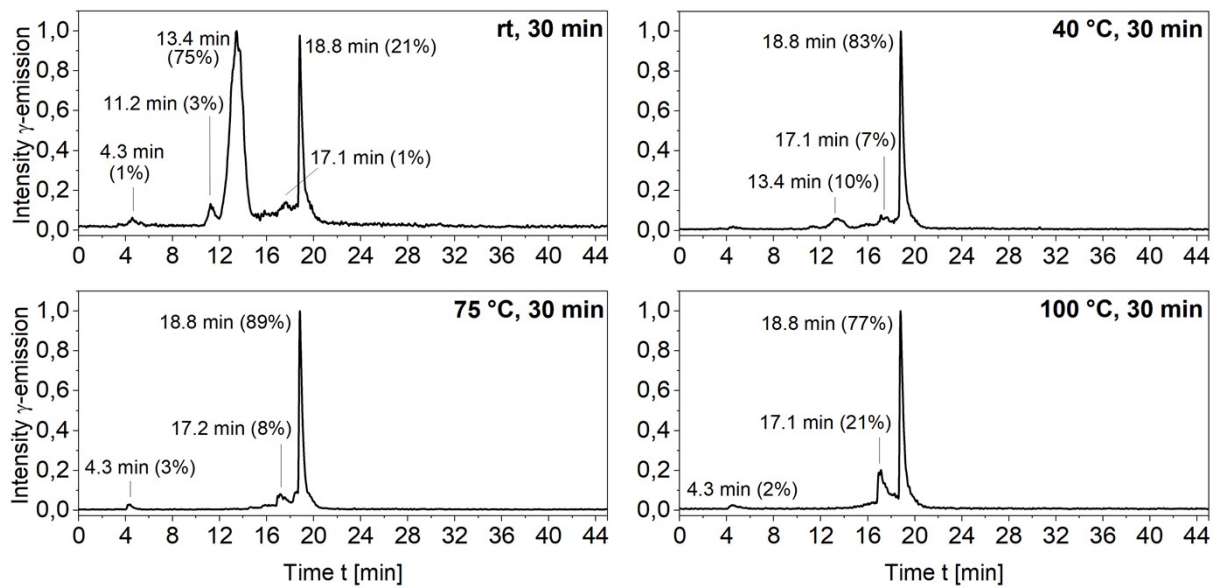

Radio-HPLC chromatograms of the reaction progress of the strain-promoted click reaction between  $^{99m}\text{Tc}$ -DPA-DACN and PSMA- $\text{N}_3$  proceeding at rt (top left), 40 °C, 75 °C, and 100 °C.

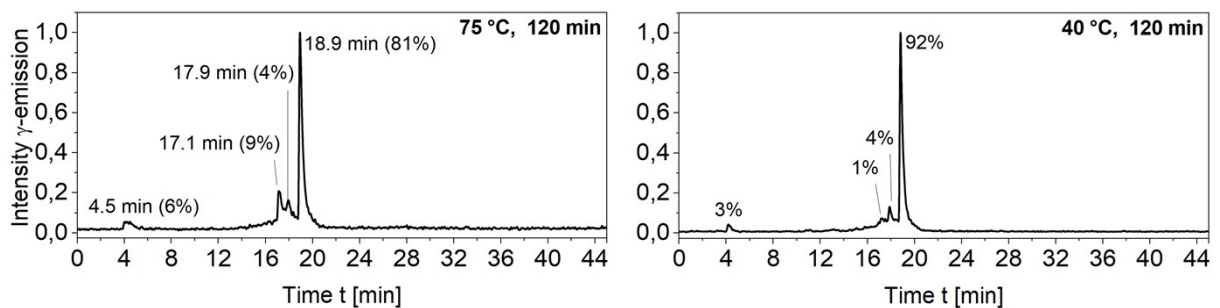

Radio-HPLC chromatograms of the reaction progress of the strain-promoted click reaction between  $^{99m}\text{Tc}$ -DPA-DACN and PSMA- $\text{N}_3$  at 75 °C and 40 °C after 2 h. The clicked  $^{99m}\text{Tc}$ -PSMA derivative  $^{99m}\text{Tc}$ -DPA-DACN-PSMA has a retention time of  $t_R = 17.9$  min.



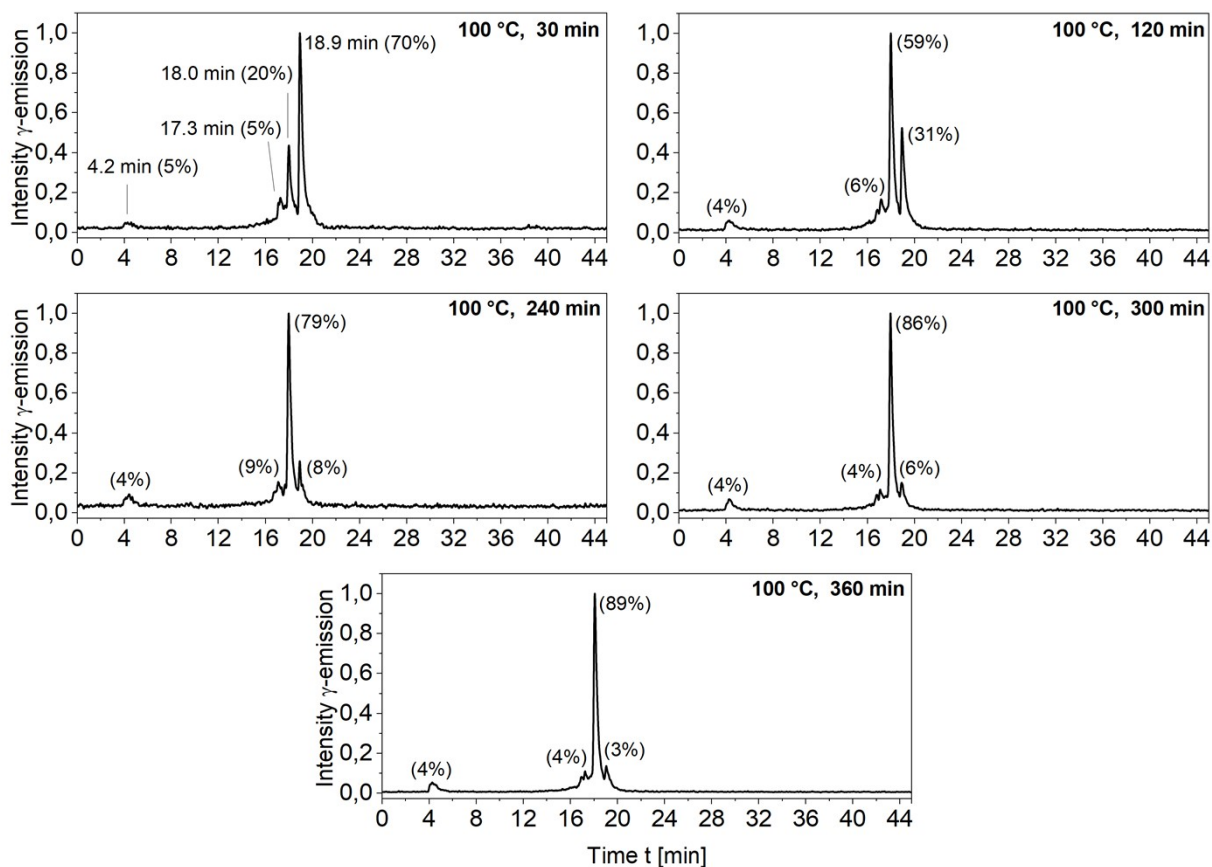

Radio-HPLC chromatograms of the reaction progress of the strain-promoted click reaction between  $[^{99m}\text{Tc}]\text{Tc-DPA-DACN}$  and  $\text{PSMA-N}_3$  at  $100\text{ }^\circ\text{C}$  after 30 min, 120 min, 240 min, 300 min, and 360 min. The clicked  $^{99m}\text{Tc-PSMA}$  derivative  $[^{99m}\text{Tc}]\text{Tc-DPA-PSMA}$  has a retention time of  $t_R = 18.0$  min.

## $^{99m}\text{Tc}$ -Radiolabeling of TFP-ester **10** and conventional labeling of PSMA-NH<sub>2</sub>

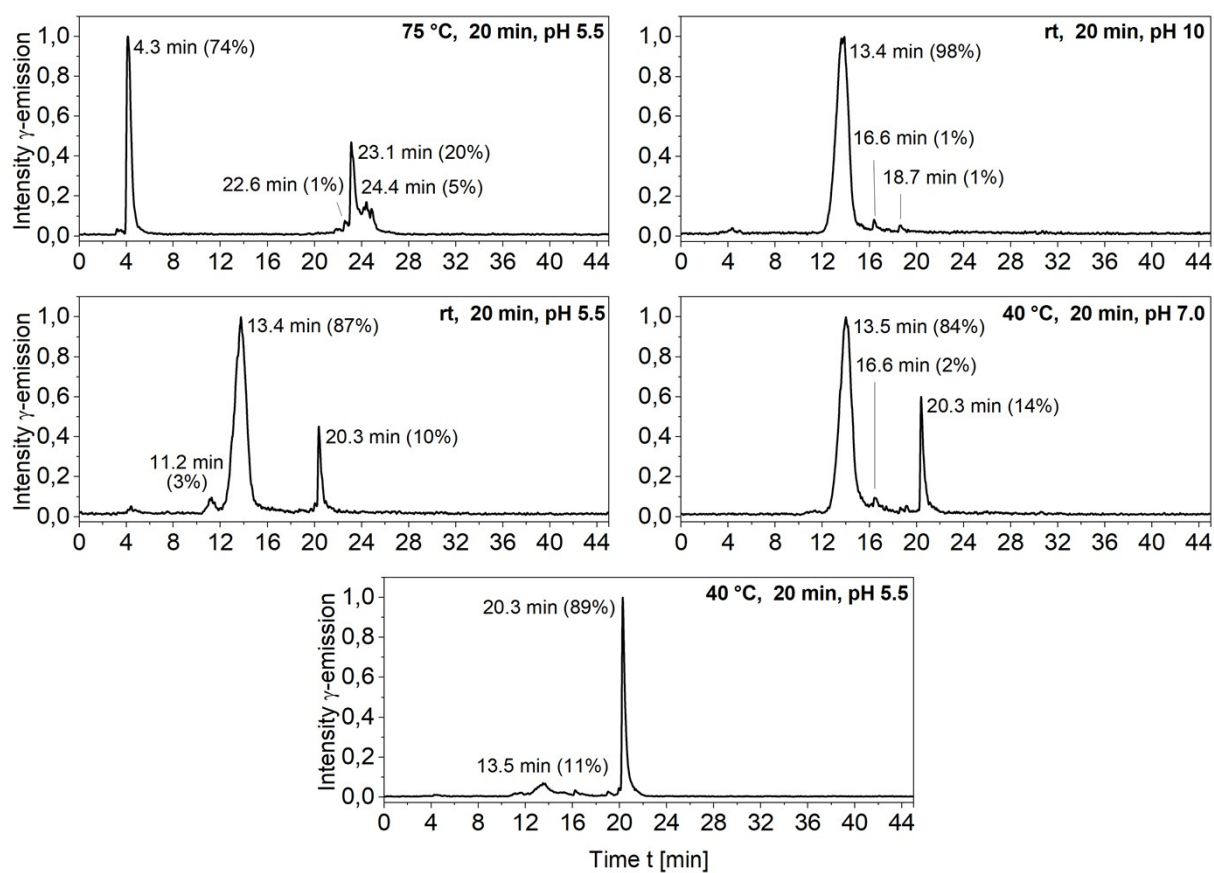

Radio-HPLC chromatograms of  $^{99m}\text{Tc}$ -radiolabeling of DPA-TFP ester **10** ( $t_R = 20.3$  min) at different reaction conditions.

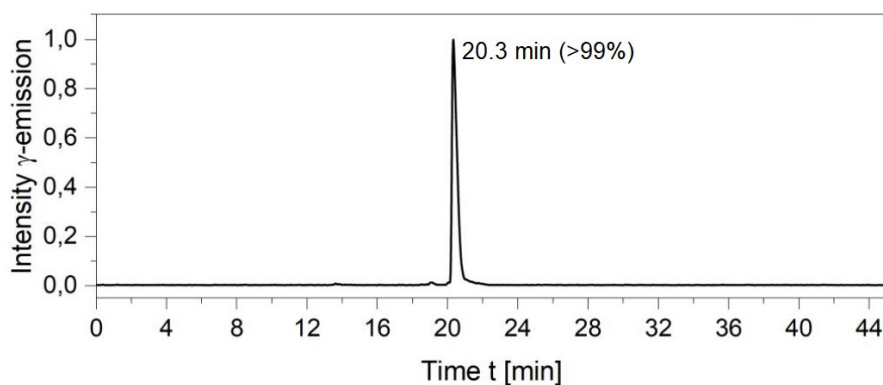

Radio-HPLC chromatogram of purified complex  $[^{99m}\text{Tc}]\text{Tc-DPA-TFP}$  ( $t_R = 20.3$  min) after separation using an RP18 cartridge.

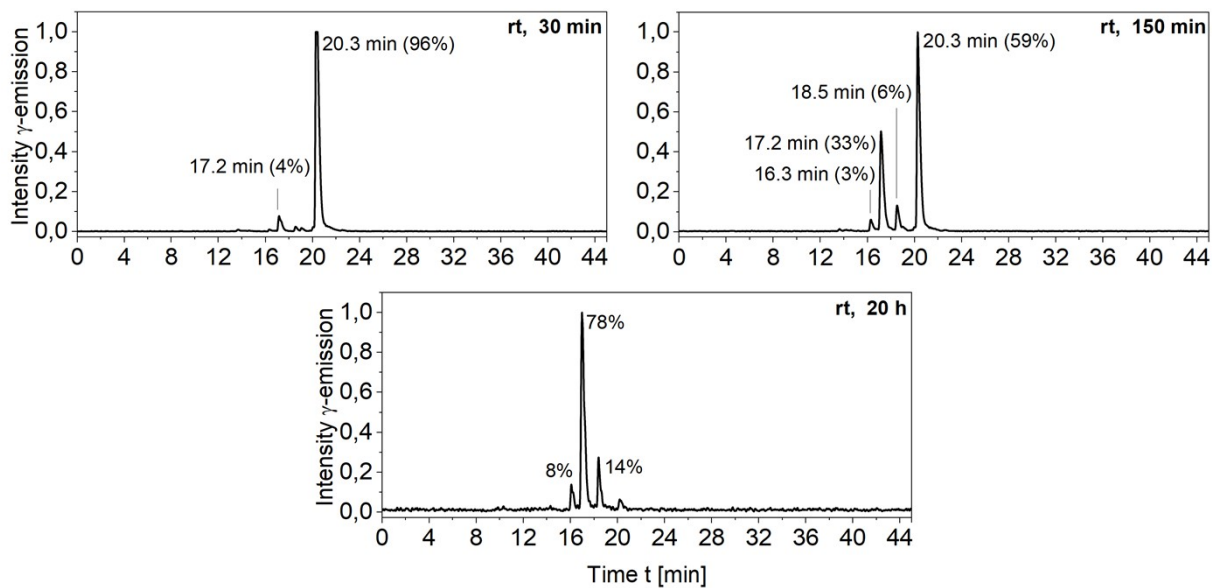

Radio-HPLC chromatograms of the reaction progress of the reaction between  $[^{99m}\text{Tc}]\text{Tc-DPA-TFP}$  ( $t_R = 20.3$  min) and  $\text{PSMA-NH}_2$  to  $[^{99m}\text{Tc}]\text{Tc-DPA-PSMA}$  ( $t_R = 16.3$  min) at room temperature after 30 min, 150 min, and 20 h.

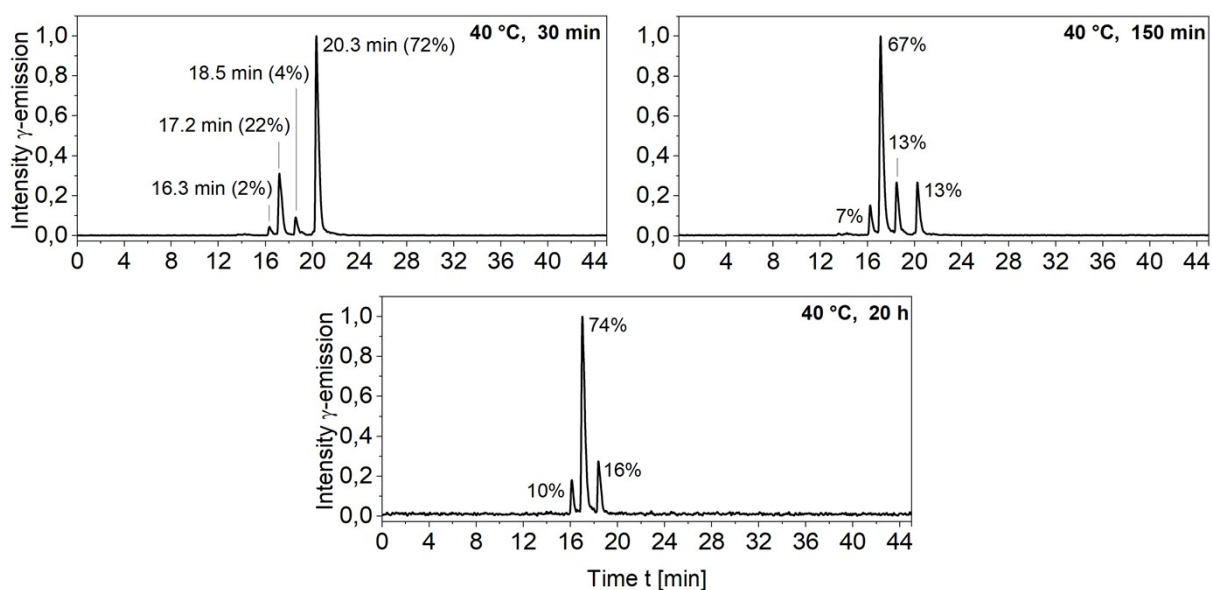

Radio-HPLC chromatograms of the reaction progress of the reaction between  $[^{99m}\text{Tc}]\text{Tc-DPA-TFP}$  ( $t_R = 20.3$  min) and  $\text{PSMA-NH}_2$  to  $[^{99m}\text{Tc}]\text{Tc-DPA-PSMA}$  ( $t_R = 16.3$  min) at 40 °C after 30 min, 150 min, and 20 h.

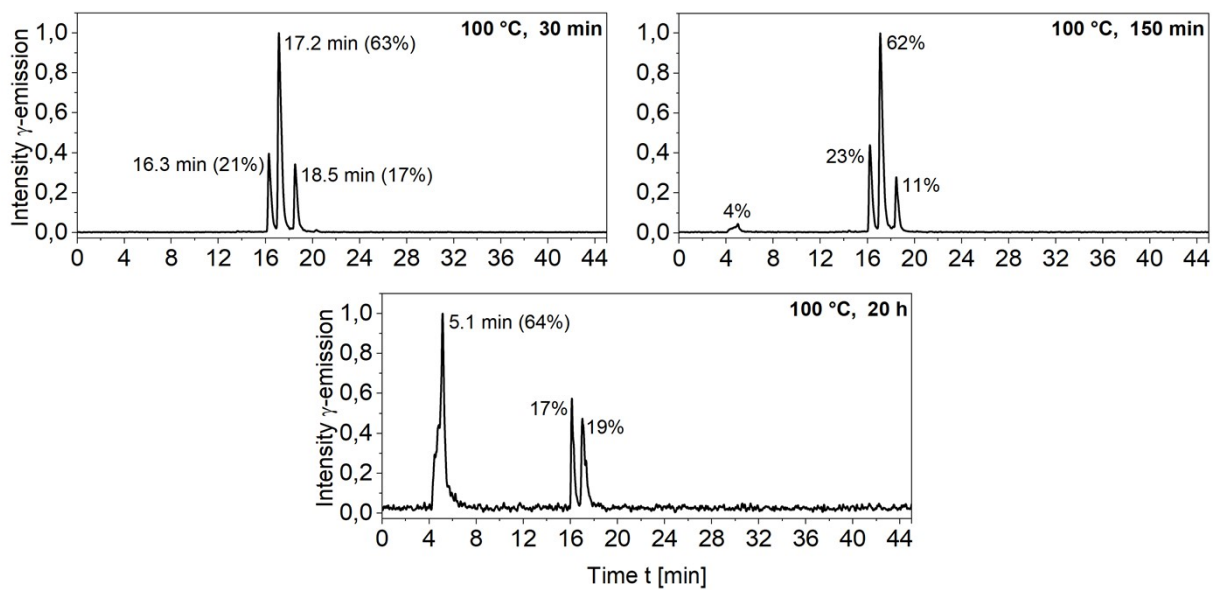

Radio-HPLC chromatograms of the reaction progress of the reaction between  $[^{99m}\text{Tc}]\text{Tc-DPA-TFP}$  ( $t_R = 20.3$  min) and  $\text{PSMA-NH}_2$  to  $[^{99m}\text{Tc}]\text{Tc-DPA-PSMA}$  ( $t_R = 16.3$  min) at 100 °C after 30 min, 150 min, and 20 h.
